# Supplementary material for: Unraveling the Bonding Complexity of Polyhalogen Anions: High-Pressure Synthesis of Unpredicted Sodium Chlorides Na2Cl3 and Na4Cl5 and Bromide Na4Br5
Source: PubMed Central journal article supplement — JACS Au. 2023 Jun 5;3(6):1634–41. doi: 10.1021/jacsau.3c00090 (PMC10302743; doi:10.1021/jacsau.3c00090), 2023-06-05
Supplement: au3c00090_si_001.pdf [file au3c00090_si_001.pdf]

## Supporting Information

### Unraveling the Bonding Complexity of Polyhalogen Anions: High-Pressure Synthesis of

#### Unpredicted Sodium Chlorides Na<sub>2</sub>Cl<sub>3</sub>, Na<sub>4</sub>Cl<sub>5</sub> and Bromide Na<sub>4</sub>Br<sub>5</sub>

Yuqing Yin<sup>1,2\*</sup>, Alena Aslandukova<sup>3</sup>, Nityasagar Jena<sup>4</sup>, Florian Trybel<sup>4</sup>, Igor A. Abrikosov<sup>4</sup>, Bjoern Winkler<sup>5</sup>, Saiana Khandarkhaeva<sup>3</sup>, Timofey Fedotenko<sup>6</sup>, Elena Bykova<sup>3,7</sup>, Dominique Laniel<sup>8</sup>, Maxim Bykov<sup>9</sup>, Andrey Aslandukov<sup>1,3</sup>, Fariia I. Akbar<sup>1,3</sup>, Konstantin Glazyrin<sup>6</sup>, Gaston Garbarino<sup>10</sup>, Carlotta Giacobbe<sup>10</sup>, Eleanor L. Bright<sup>10</sup>, Zhitai Jia<sup>2</sup>, Leonid Dubrovinsky<sup>3</sup>, Natalia Dubrovinskaya<sup>1,4</sup>

<sup>1</sup>Material Physics and Technology at Extreme Conditions, Laboratory of Crystallography, University of Bayreuth, 95440 Bayreuth, Germany

<sup>2</sup>State Key Laboratory of Crystal Materials, Shandong University, Jinan 250100, China

<sup>3</sup>Bayerisches Geoinstitut, University of Bayreuth, 95440 Bayreuth, Germany

<sup>4</sup>Department of Physics, Chemistry and Biology (IFM), Linköping University, SE-581 83, Linköping, Sweden

<sup>5</sup>Institute für Geowissenschaften, Frankfurt University, Altenhöferallee 1, DE-60438 Frankfurt am Main, Germany

<sup>6</sup>Deutsches Elektronen-Synchrotron DESY, Notkestr. 85, 22607 Hamburg, Germany

<sup>7</sup>Earth and Planets Laboratory, Carnegie Institution for Science, 5241 Broad Branch Road, NW, Washington DC, 20015, USA

<sup>8</sup>Centre for Science at Extreme Conditions and School of Physics and Astronomy, University of Edinburgh, EH9 3FD Edinburgh, United Kingdom

<sup>9</sup>Institute of Inorganic Chemistry, University of Cologne, Greinstrasse 6, 50939 Cologne, Germany

<sup>10</sup>European Synchrotron Radiation Facility, B.P.220, F-38043 Grenoble Cedex, France

\*Corresponding author. Email: [Yuqing.Yin@uni-bayreuth.de](mailto:Yuqing.Yin@uni-bayreuth.de) (Y.Y.)

## Supplementary Methods

**Sample preparation.** BX90-type screw-driven diamond anvil cells (DACs)<sup>1</sup> equipped with 250  $\mu\text{m}$  (DAC #1-#3) or 120  $\mu\text{m}$  (DAC #4 and #5) culet diamond anvils were used (Table S1). One stack of halide (NaCl/NaBr/KCl/KBr) thin (2-5  $\mu\text{m}$ ) plate was loaded together with a drop of  $\text{CCl}_4$  (DAC #1 and #2) or a piece of  $\text{CBr}_4$  (DAC #3-#5) acts as the halogen source. Rhenium was used as the gasket material. NaCl, NaBr, KCl, and KBr powders were dried on a heating table at 220  $^\circ\text{C}$  for 48 h before loading to avoid any presence of water. The *in situ* pressure was measured using the first-order Raman mode of the stressed diamond anvils<sup>2</sup>. Double-sided sample laser-heating was performed at our home laboratory at the Bayerisches Geoinstitut<sup>3</sup> with carbon or bromine employed as the laser light absorber. Detailed information of pressure and the heating temperature can be found in Table S1.

**X-ray diffraction.** Synchrotron X-ray diffraction measurements of the compressed samples were performed at ID11 ( $\lambda = 0.2844 \text{ \AA}$ , beam size  $\sim 0.75 \times 0.75 \mu\text{m}^2$ ) and ID27 ( $\lambda = 0.3738 \text{ \AA}$ , beam size  $\sim 2.0 \times 2.0 \mu\text{m}^2$ ) of the EBS-ESRF and the P02.2 beamline ( $\lambda = 0.2907 \text{ \AA}$ , beam size  $\sim 2.0 \times 2.0 \mu\text{m}^2$ ) of PETRA III. In order to determine the sample position for single-crystal X-ray diffraction data acquisition, a full X-ray diffraction mapping of the pressure chamber was performed. The sample positions displaying the greatest number of single-crystal reflections belonging to the phases of interest were chosen, and step-scans of  $0.5^\circ$  from  $-36^\circ$  to  $+36^\circ$   $\omega$  were performed. The CrysAlis<sup>Pro</sup> software<sup>4</sup> was utilized for the single-crystal data analysis. To calibrate the instrumental model in the CrysAlis<sup>Pro</sup> software, *i.e.* the sample-to-detector distance, detector's origin, offsets of the goniometer angles, and rotation of both the X-ray beam and detector around the instrument axis, we used a single crystal of orthoenstatite  $[(\text{Mg}_{1.93}\text{Fe}_{0.06})(\text{Si}_{1.93}\text{Al}_{0.06})\text{O}_6]$ , *Pbca* space group,  $a = 8.8117(2) \text{ \AA}$ ,  $b = 5.1832(10) \text{ \AA}$ , and  $c = 18.2391(3) \text{ \AA}$ . The DAFi program<sup>5</sup> was used for the search of reflections' groups belonging to individual single-crystal domains. The crystal structures were then solved and refined using the OLEX2<sup>6</sup> and JANA2006 software<sup>7</sup>. The crystallite sizes were estimated from X-ray maps. The crystallographic information is available in Tables S2-S10.

**Raman spectroscopy.** Raman spectroscopy measurements were performed with a LabRam spectrometer equipped with a  $\times 50$  Olympus objective. Sample excitation was accomplished using a continuous He-Ne laser (632.8 nm line) with a focused laser spot of about 2  $\mu\text{m}$  in diameter. The Stokes Raman signal was collected in a backscattering geometry by a CCD coupled to an 1800 l/mm grating, allowing a spectral resolution of approximately  $2 \text{ cm}^{-1}$ . A laser power of about 4.6 mW incident on the DAC was employed. Raman spectra of  $\text{CBr}_4$  were collected as a reference using a DAC loaded with pure  $\text{CBr}_4$  (Figure S8).

**Density functional theory calculations.** First-principles calculations were performed using the framework of density functional theory (DFT) as implemented in the Vienna Ab initio Simulation Package (VASP)<sup>8</sup>. The Projector-Augmented-Wave (PAW) method<sup>9-10</sup> was used to expand the electronic wave functions in a plane wave basis. The Generalized Gradient Approximation (GGA) functional is used for calculating the exchange-correlation energies, as proposed by Perdew–Burke–Ernzerhof (PBE)<sup>11</sup>. The PAW potentials adapted from the VASP library with following valence configurations of  $2s2p3s$  for Na,  $3s3p4s$  for K,  $3s3p$  for Cl, and  $4s4p$  for Br were used. The plane-wave kinetic energy cutoff was set to 800 eV. We performed variable cell relaxations including lattice parameters and atomic positions on all synthesized experimental structures to optimize the atomic coordinates and the cell vectors until the total forces were smaller than  $10^{-6} \text{ eV \AA}^{-1}$  per atom using the conjugate-gradient (CG) algorithm. In geometry optimization, we used a Gamma centred k-mesh of  $7 \times 7 \times 11$  (for  $\text{Na}_4\text{Cl}_5$ ,  $\text{Na}_4\text{Br}_5$ ),  $7 \times 7 \times 15$  (for  $\text{Na}_2\text{Cl}_3$ ), and  $13 \times 13 \times 13$  (for  $\text{NaCl}_3$ ), respectively. To increase the accuracy of ground-state electron density and density of states (DOS), a denser Gamma centred k-mesh of  $21 \times 21 \times 21$  in case of  $\text{NaCl}_3$  and  $18 \times 18 \times 21$  for  $\text{Na}_4\text{Cl}_5$  ( $\text{Na}_4\text{Br}_5$ ) were used considering the number of electronic bands twice than that of number of electrons in the respective systems. The tetrahedron smearing method with Blöchl corrections (ISMEAR = -5) were used for the pDOS and for the partial charge density around the Fermi energy.

The crystal structure, ELF, and charge density maps visualisation were made with the VESTA software<sup>12</sup>. The finite displacement method, as implemented in PHONOPY<sup>13</sup>, was used to calculate harmonic phonon frequencies and phonon band structures. A supercell size of 2x2x3 in case of Na<sub>4</sub>Cl<sub>5</sub> (Na<sub>4</sub>Br<sub>5</sub>), and 2x2x4 for Na<sub>2</sub>Cl<sub>3</sub> were used with k-mesh size of 2x2x2 and 3x3x3 for the harmonic phonon calculations at 0 K. The finite-temperature phonon dispersion of Na<sub>2</sub>Cl<sub>3</sub> (50 GPa) is using the temperature-dependent effective potential (TDEP) method<sup>14</sup>. The initial canonical configurations were created at thermalization temperature (300K) including the nuclear quantum effects in TDEP at a maximum phonon frequency of 16 THz for Na<sub>2</sub>Cl<sub>3</sub> (50 GPa). Self-consistent iterations were performed to converge the second order interatomic force constants (FCs) by considering a cutoff radius of 6 Å in a 2x2x5 supercell containing 200 atoms. Crystal orbital Hamilton population (COHP) and crystal orbital bond index (COBI) analyses were performed using the LOBSTER package<sup>15-19</sup>.

## Supplementary Tables

**Table S1.** Summary of the experiments on high-pressure high-temperature synthesis in a diamond anvil cell.

| DAC number | Starting materials                              | Pressure (GPa, $\pm 1$ ) | Measured temperature (K, $\pm 200$ ) | Reaction products                                                                               |
|------------|-------------------------------------------------|--------------------------|--------------------------------------|-------------------------------------------------------------------------------------------------|
| 1          | NaCl + CCl <sub>4</sub> + C <sub>graphite</sub> | 50                       | 2100                                 | <i>hP18</i> -Na <sub>4</sub> Cl <sub>5</sub>                                                    |
|            |                                                 | 56                       | 2200                                 | <i>tP10</i> -Na <sub>2</sub> Cl <sub>3</sub><br><i>cP8</i> -NaCl <sub>3</sub>                   |
| 2          | KCl + CCl <sub>4</sub> + C <sub>graphite</sub>  | 41                       | 2000                                 | <i>cP8</i> -KCl <sub>3</sub>                                                                    |
|            |                                                 | 50                       | 2100                                 | <i>hP24</i> -KCl <sub>3</sub>                                                                   |
| 3          | NaBr* + CBr <sub>4</sub>                        | 48                       | 2000                                 | <i>hP18</i> -Na <sub>4</sub> Br <sub>5</sub>                                                    |
| 4          | NaBr + CBr <sub>4</sub> *                       | 46                       | 2200                                 | <i>cP8</i> -NaBr <sub>3</sub><br><i>oC8</i> -Br                                                 |
|            |                                                 | 73                       | 2300                                 | <i>cP8</i> -NaBr <sub>3</sub><br><i>hP18</i> -Na <sub>4</sub> Br <sub>5</sub><br><i>oC8</i> -Br |
| 5          | KBr + CBr <sub>4</sub> *                        | 80                       | 2000                                 | <i>cP8</i> -KBr <sub>3</sub>                                                                    |

\* The reagents marked with the star were put into the DACs in excess to explore the effect of different ratios of the starting materials on the reaction products.

**Table S2.** Crystal structure, data collection and refinement details of *cP8*-NaCl<sub>3</sub> at 50(1) and 56(1) GPa in comparison to the corresponding DFT-relaxed structure.

| <b>Crystal data</b>                                                        |                                                                                                                                                                                              |                                                                                                                                                                                              | <b>DFT results</b>           |
|----------------------------------------------------------------------------|----------------------------------------------------------------------------------------------------------------------------------------------------------------------------------------------|----------------------------------------------------------------------------------------------------------------------------------------------------------------------------------------------|------------------------------|
| Chemical formula                                                           | NaCl <sub>3</sub>                                                                                                                                                                            | NaCl <sub>3</sub>                                                                                                                                                                            | NaCl <sub>3</sub>            |
| $M_r$                                                                      | 129.34                                                                                                                                                                                       | 129.34                                                                                                                                                                                       |                              |
| Crystal system, space group                                                | Cubic, $Pm\bar{3}n$                                                                                                                                                                          | Cubic, $Pm\bar{3}n$                                                                                                                                                                          | Cubic, $Pm\bar{3}n$          |
| Temperature (K)                                                            | 293                                                                                                                                                                                          | 293                                                                                                                                                                                          |                              |
| Pressure (GPa)                                                             | 50(1)                                                                                                                                                                                        | 56(1)                                                                                                                                                                                        | 50                           |
| $a$ (Å)                                                                    | 4.7070(3)                                                                                                                                                                                    | 4.6737(9)                                                                                                                                                                                    | 4.6743                       |
| $V$ (Å <sup>3</sup> )                                                      | 104.29(2)                                                                                                                                                                                    | 102.09(6)                                                                                                                                                                                    | 102.1283                     |
| $Z$                                                                        | 2                                                                                                                                                                                            | 2                                                                                                                                                                                            |                              |
| Radiation type                                                             | Synchrotron, $\lambda = 0.2907$ Å                                                                                                                                                            | Synchrotron, $\lambda = 0.3738$ Å                                                                                                                                                            |                              |
| $\mu$ (mm <sup>-1</sup> )                                                  | 0.35                                                                                                                                                                                         | 0.70                                                                                                                                                                                         |                              |
| Crystal size (mm)                                                          | 0.001 × 0.001 × 0.001                                                                                                                                                                        | 0.001 × 0.001 × 0.001                                                                                                                                                                        |                              |
| <b>Data collection</b>                                                     |                                                                                                                                                                                              |                                                                                                                                                                                              |                              |
| Diffractometer                                                             | LH@P02.2                                                                                                                                                                                     | ESRF ID27, EIGER2 X CdTe 9M detector                                                                                                                                                         |                              |
| Absorption correction                                                      | Multi-scan<br><i>CrysAlis PRO</i> 1.171.40.67a (Rigaku Oxford Diffraction, 2019) Empirical absorption correction using spherical harmonics, implemented in SCALE3 ABSPACK scaling algorithm. | Multi-scan<br><i>CrysAlis PRO</i> 1.171.40.67a (Rigaku Oxford Diffraction, 2019) Empirical absorption correction using spherical harmonics, implemented in SCALE3 ABSPACK scaling algorithm. |                              |
| $T_{\min}, T_{\max}$                                                       | 0.786, 1                                                                                                                                                                                     | 0.381, 1                                                                                                                                                                                     |                              |
| No. of measured, independent and observed [ $I > 2\sigma(I)$ ] reflections | 420, 72, 67                                                                                                                                                                                  | 208, 58, 45                                                                                                                                                                                  |                              |
| $R_{\text{int}}$                                                           | 0.104                                                                                                                                                                                        | 0.056                                                                                                                                                                                        |                              |
| $(\sin \theta/\lambda)_{\text{max}}$ (Å <sup>-1</sup> )                    | 0.908                                                                                                                                                                                        | 0.920                                                                                                                                                                                        |                              |
| <b>Refinement</b>                                                          |                                                                                                                                                                                              |                                                                                                                                                                                              |                              |
| $R[F^2 > 2\sigma(F^2)], wR(F^2), S$                                        | 0.051, 0.126, 1.23                                                                                                                                                                           | 0.058, 0.186, 1.28                                                                                                                                                                           |                              |
| No. of reflections                                                         | 72                                                                                                                                                                                           | 58                                                                                                                                                                                           |                              |
| No. of parameters                                                          | 4                                                                                                                                                                                            | 4                                                                                                                                                                                            |                              |
| $\Delta\rho_{\text{max}}, \Delta\rho_{\text{min}}$ (e Å <sup>-3</sup> )    | 1.00, -0.61                                                                                                                                                                                  | 0.82, -0.76                                                                                                                                                                                  |                              |
| <b>Crystal Structure</b>                                                   |                                                                                                                                                                                              |                                                                                                                                                                                              |                              |
| Wyckoff Site                                                               | Na1: $2a$<br>Cl1: $6d$                                                                                                                                                                       | Na1: $2a$<br>Cl1: $6d$                                                                                                                                                                       | Na1: $2a$<br>Cl1: $6d$       |
| Fractional atomic coordinates (x y z)                                      | Na1: 0 0 0<br>Cl1: 1/4 1/2 0                                                                                                                                                                 | Na1: 0 0 0<br>Cl1: 1/4 1/2 0                                                                                                                                                                 | Na1: 0 0 0<br>Cl1: 1/4 1/2 0 |
| $U_{\text{iso}}$ (Å <sup>2</sup> )                                         | Na1: 0.0137(7)<br>Cl1: 0.0176(5)                                                                                                                                                             | Na1: 0.0224(12)<br>Cl1: 0.0263(10)                                                                                                                                                           |                              |

**Table S3.** Crystal structure, data collection and refinement details of *cP8*-KCl<sub>3</sub> at 41(1) and 50(1) GPa in comparison to the corresponding DFT-relaxed structure.

| <b>Crystal data</b>                                                        |                                                                                                                                                                                              |                                                                                                                                                                                              | <b>DFT results</b>          |
|----------------------------------------------------------------------------|----------------------------------------------------------------------------------------------------------------------------------------------------------------------------------------------|----------------------------------------------------------------------------------------------------------------------------------------------------------------------------------------------|-----------------------------|
| Chemical formula                                                           | KCl <sub>3</sub>                                                                                                                                                                             | KCl <sub>3</sub>                                                                                                                                                                             | KCl <sub>3</sub>            |
| $M_r$                                                                      | 145.45                                                                                                                                                                                       | 145.45                                                                                                                                                                                       |                             |
| Crystal system, space group                                                | Cubic, $Pm\bar{3}n$                                                                                                                                                                          | Cubic, $Pm\bar{3}n$                                                                                                                                                                          | Cubic, $Pm\bar{3}n$         |
| Temperature (K)                                                            | 293                                                                                                                                                                                          | 293                                                                                                                                                                                          |                             |
| Pressure (GPa)                                                             | 41(1)                                                                                                                                                                                        | 50(1)                                                                                                                                                                                        | 42                          |
| $a$ (Å)                                                                    | 4.9313(5)                                                                                                                                                                                    | 4.8194(10)                                                                                                                                                                                   | 4.9258                      |
| $V$ (Å <sup>3</sup> )                                                      | 119.92(4)                                                                                                                                                                                    | 111.94(7)                                                                                                                                                                                    | 119.51717                   |
| $Z$                                                                        | 2                                                                                                                                                                                            | 2                                                                                                                                                                                            |                             |
| Radiation type                                                             | Synchrotron, $\lambda = 0.3738$ Å                                                                                                                                                            | Synchrotron, $\lambda = 0.3738$ Å                                                                                                                                                            |                             |
| $\mu$ (mm <sup>-1</sup> )                                                  | 0.84                                                                                                                                                                                         | 0.90                                                                                                                                                                                         |                             |
| Crystal size (mm)                                                          | 0.001 × 0.001 × 0.001                                                                                                                                                                        | 0.001 × 0.001 × 0.001                                                                                                                                                                        |                             |
| <b>Data collection</b>                                                     |                                                                                                                                                                                              |                                                                                                                                                                                              |                             |
| Diffractometer                                                             | ESRF ID27, EIGER2 X CdTe 9M detector                                                                                                                                                         | ESRF ID27, EIGER2 X CdTe 9M detector                                                                                                                                                         |                             |
| Absorption correction                                                      | Multi-scan<br><i>CrysAlis PRO</i> 1.171.40.67a (Rigaku Oxford Diffraction, 2019) Empirical absorption correction using spherical harmonics, implemented in SCALE3 ABSPACK scaling algorithm. | Multi-scan<br><i>CrysAlis PRO</i> 1.171.40.67a (Rigaku Oxford Diffraction, 2019) Empirical absorption correction using spherical harmonics, implemented in SCALE3 ABSPACK scaling algorithm. |                             |
| $T_{\min}, T_{\max}$                                                       | 0.235, 1                                                                                                                                                                                     | 0.570, 1                                                                                                                                                                                     |                             |
| No. of measured, independent and observed [ $I > 2\sigma(I)$ ] reflections | 234, 58, 50                                                                                                                                                                                  | 246, 68, 56                                                                                                                                                                                  |                             |
| $R_{\text{int}}$                                                           | 0.016                                                                                                                                                                                        | 0.052                                                                                                                                                                                        |                             |
| $(\sin \theta/\lambda)_{\text{max}}$ (Å <sup>-1</sup> )                    | 0.890                                                                                                                                                                                        | 0.892                                                                                                                                                                                        |                             |
| <b>Refinement</b>                                                          |                                                                                                                                                                                              |                                                                                                                                                                                              |                             |
| $R[F^2 > 2\sigma(F^2)], wR(F^2), S$                                        | 0.054, 0.150, 1.21                                                                                                                                                                           | 0.041, 0.103, 1.13                                                                                                                                                                           |                             |
| No. of reflections                                                         | 58                                                                                                                                                                                           | 68                                                                                                                                                                                           |                             |
| No. of parameters                                                          | 4                                                                                                                                                                                            | 4                                                                                                                                                                                            |                             |
| $\Delta\rho_{\text{max}}, \Delta\rho_{\text{min}}$ (e Å <sup>-3</sup> )    | 1.02, -0.60                                                                                                                                                                                  | 0.92, -0.97                                                                                                                                                                                  |                             |
| <b>Crystal Structure</b>                                                   |                                                                                                                                                                                              |                                                                                                                                                                                              |                             |
| Wyckoff Site                                                               | K1: $2a$<br>Cl1: $6d$                                                                                                                                                                        | K1: $2a$<br>Cl1: $6d$                                                                                                                                                                        | K1: $2a$<br>Cl1: $6d$       |
| Fractional atomic coordinates (x y z)                                      | K1: 0 0 0<br>Cl1: 1/4 1/2 0                                                                                                                                                                  | K1: 0 0 0<br>Cl1: 1/4 1/2 0                                                                                                                                                                  | K1: 0 0 0<br>Cl1: 1/4 1/2 0 |
| $U_{\text{iso}}$ (Å <sup>2</sup> )                                         | K1: 0.0230(8)<br>Cl1: 0.0336(8)                                                                                                                                                              | K1: 0.0154(5)<br>Cl1: 0.0200(4)                                                                                                                                                              |                             |

**Table S4.** Crystal structure, data collection and refinement details of *cP8*-KBr<sub>3</sub> at 80(1) GPa in comparison to the corresponding DFT-relaxed structure.

| <b>Crystal data</b>                                                        |                                                                                                                                                                                              | <b>DFT results</b>          |
|----------------------------------------------------------------------------|----------------------------------------------------------------------------------------------------------------------------------------------------------------------------------------------|-----------------------------|
| Chemical formula                                                           | KBr <sub>3</sub>                                                                                                                                                                             | KBr <sub>3</sub>            |
| $M_r$                                                                      | 278.83                                                                                                                                                                                       |                             |
| Crystal system, space group                                                | Cubic, $Pm\bar{3}n$                                                                                                                                                                          | Cubic, $Pm\bar{3}n$         |
| Temperature (K)                                                            | 293                                                                                                                                                                                          |                             |
| Pressure (GPa)                                                             | 80(1)                                                                                                                                                                                        | 79.5                        |
| $a$ (Å)                                                                    | 4.8898(3)                                                                                                                                                                                    | 4.8898                      |
| $V$ (Å <sup>3</sup> )                                                      | 116.92(2)                                                                                                                                                                                    | 116.9158                    |
| $Z$                                                                        | 2                                                                                                                                                                                            |                             |
| Radiation type                                                             | Synchrotron, $\lambda = 0.2844$ Å                                                                                                                                                            |                             |
| $\mu$ (mm <sup>-1</sup> )                                                  | 4.44                                                                                                                                                                                         |                             |
| Crystal size (mm)                                                          | 0.001 × 0.001 × 0.001                                                                                                                                                                        |                             |
| <b>Data collection</b>                                                     |                                                                                                                                                                                              |                             |
| Diffractometer                                                             | ESRF ID11, Dectris Eiger2 X CdTe 4M                                                                                                                                                          |                             |
| Absorption correction                                                      | Multi-scan<br><i>CrysAlis PRO</i> 1.171.40.67a (Rigaku Oxford Diffraction, 2019) Empirical absorption correction using spherical harmonics, implemented in SCALE3 ABSPACK scaling algorithm. |                             |
| $T_{\min}, T_{\max}$                                                       | 0.282, 1                                                                                                                                                                                     |                             |
| No. of measured, independent and observed [ $I > 2\sigma(I)$ ] reflections | 556, 80, 70                                                                                                                                                                                  |                             |
| $R_{\text{int}}$                                                           | 0.026                                                                                                                                                                                        |                             |
| $(\sin \theta/\lambda)_{\text{max}}$ (Å <sup>-1</sup> )                    | 0.903                                                                                                                                                                                        |                             |
| <b>Refinement</b>                                                          |                                                                                                                                                                                              |                             |
| $R[F^2 > 2\sigma(F^2)], wR(F^2), S$                                        | 0.014, 0.036, 1.12                                                                                                                                                                           |                             |
| No. of reflections                                                         | 80                                                                                                                                                                                           |                             |
| No. of parameters                                                          | 4                                                                                                                                                                                            |                             |
| $\Delta\rho_{\text{max}}, \Delta\rho_{\text{min}}$ (e Å <sup>-3</sup> )    | 2.06, -0.55                                                                                                                                                                                  |                             |
| <b>Crystal Structure</b>                                                   |                                                                                                                                                                                              |                             |
| Wyckoff Site                                                               | K1: $2a$<br>Br1: $6d$                                                                                                                                                                        | K1: $2a$<br>Br1: $6d$       |
| Fractional atomic coordinates (x y z)                                      | K1: 0 0 0<br>Br1: 1/4 1/2 0                                                                                                                                                                  | K1: 0 0 0<br>Br1: 1/4 1/2 0 |
| $U_{\text{iso}}$ (Å <sup>2</sup> )                                         | K1: 0.0045(17)<br>Br1: 0.0052(12)                                                                                                                                                            |                             |

**Table S5.** Crystal structure, data collection and refinement details of *cP8-NaBr<sub>3-x</sub>* with a partial occupancy of Br1 position at 46(1) and 73(1) GPa in comparison to the corresponding DFT-relaxed structure.

| <b>Crystal data</b>                                                        |                                                                                                                                                                                              |                                                                                                                                                                                              | <b>DFT results</b>                 |
|----------------------------------------------------------------------------|----------------------------------------------------------------------------------------------------------------------------------------------------------------------------------------------|----------------------------------------------------------------------------------------------------------------------------------------------------------------------------------------------|------------------------------------|
| Chemical formula                                                           | NaBr <sub>3-x</sub>                                                                                                                                                                          | NaBr <sub>3-x</sub>                                                                                                                                                                          | NaBr <sub>3</sub>                  |
| $M_r$                                                                      | 194.80                                                                                                                                                                                       | 204.39                                                                                                                                                                                       |                                    |
| Crystal system, space group                                                | Cubic, $Pm\bar{3}n$                                                                                                                                                                          | Cubic, $Pm\bar{3}n$                                                                                                                                                                          | Cubic, $Pm\bar{3}n$                |
| Temperature (K)                                                            | 293                                                                                                                                                                                          | 293                                                                                                                                                                                          |                                    |
| Pressure (GPa)                                                             | 46(1)                                                                                                                                                                                        | 73(1)                                                                                                                                                                                        | 80                                 |
| $a$ (Å)                                                                    | 5.0457(10)                                                                                                                                                                                   | 4.7588(4)                                                                                                                                                                                    | 4.7801                             |
| $V$ (Å <sup>3</sup> )                                                      | 128.46(8)                                                                                                                                                                                    | 107.77(3)                                                                                                                                                                                    | 109.2225                           |
| $Z$                                                                        | 2                                                                                                                                                                                            | 2                                                                                                                                                                                            |                                    |
| Radiation type                                                             | Synchrotron, $\lambda = 0.2907$ Å                                                                                                                                                            | Synchrotron, $\lambda = 0.2844$ Å                                                                                                                                                            |                                    |
| $\mu$ (mm <sup>-1</sup> )                                                  | 3.01                                                                                                                                                                                         | 3.55                                                                                                                                                                                         |                                    |
| Crystal size (mm)                                                          | 0.001 × 0.001 × 0.001                                                                                                                                                                        | 0.001 × 0.001 × 0.001                                                                                                                                                                        |                                    |
| <b>Data collection</b>                                                     |                                                                                                                                                                                              |                                                                                                                                                                                              |                                    |
| Diffractometer                                                             | LH@P02.2                                                                                                                                                                                     | ESRF ID11, Dectris Eiger2 X CdTe 4M                                                                                                                                                          |                                    |
| Absorption correction                                                      | Multi-scan<br><i>CrysAlis PRO</i> 1.171.40.67a (Rigaku Oxford Diffraction, 2019) Empirical absorption correction using spherical harmonics, implemented in SCALE3 ABSPACK scaling algorithm. | Multi-scan<br><i>CrysAlis PRO</i> 1.171.40.67a (Rigaku Oxford Diffraction, 2019) Empirical absorption correction using spherical harmonics, implemented in SCALE3 ABSPACK scaling algorithm. |                                    |
| $T_{\min}, T_{\max}$                                                       | 0.641, 1                                                                                                                                                                                     | 0.606, 1                                                                                                                                                                                     |                                    |
| No. of measured, independent and observed [ $I > 2\sigma(I)$ ] reflections | 190, 36, 29                                                                                                                                                                                  | 586, 96, 79                                                                                                                                                                                  |                                    |
| $R_{\text{int}}$                                                           | 0.129                                                                                                                                                                                        | 0.028                                                                                                                                                                                        |                                    |
| $(\sin \theta/\lambda)_{\text{max}}$ (Å <sup>-1</sup> )                    | 0.665                                                                                                                                                                                        | 0.997                                                                                                                                                                                        |                                    |
| <b>Refinement</b>                                                          |                                                                                                                                                                                              |                                                                                                                                                                                              |                                    |
| $R[F^2 > 2\sigma(F^2)], wR(F^2), S$                                        | 0.083, 0.209, 1.21                                                                                                                                                                           | 0.026, 0.068, 1.13                                                                                                                                                                           |                                    |
| No. of reflections                                                         | 36                                                                                                                                                                                           | 96                                                                                                                                                                                           |                                    |
| No. of parameters                                                          | 5                                                                                                                                                                                            | 5                                                                                                                                                                                            |                                    |
| $\Delta\rho_{\text{max}}, \Delta\rho_{\text{min}}$ (e Å <sup>-3</sup> )    | 1.59, -1.59                                                                                                                                                                                  | 1.57, -0.77                                                                                                                                                                                  |                                    |
| <b>Crystal Structure</b>                                                   |                                                                                                                                                                                              |                                                                                                                                                                                              |                                    |
| Wyckoff Site                                                               | Na1: 2a<br>Br1: 6d                                                                                                                                                                           | Na1: 2a<br>Br1: 6d                                                                                                                                                                           | Na1: 2a<br>Br1: 6d                 |
| Fractional atomic coordinates (x y z), occupancy                           | Na1: 0 0 0, 1<br>Br1: 1/4 1/2 0, 0.72(8)                                                                                                                                                     | Na1: 0 0 0, 1<br>Br1: 1/4 1/2 0, 0.757(17)                                                                                                                                                   | Na1: 0 0 0, 1<br>Br1: 1/4 1/2 0, 1 |
| $U_{\text{iso}}$ (Å <sup>2</sup> )                                         | Na1: 0.021(8)<br>Br1: 0.015(2)                                                                                                                                                               | Na1: 0.0099(8)<br>Br1: 0.0104(18)                                                                                                                                                            |                                    |



**Table S6.** Comparison of agreement factors  $R_1$  resulted from the  $cP8$ - $\text{NaBr}_{3-x}$  structure refinement using different models: with fully and partially occupied positions of Br atoms.

| Pressure,<br>(GPa, $\pm 1$ ) | No. of<br>reflections | Fully occupied model |       | Partially occupied model |       |
|------------------------------|-----------------------|----------------------|-------|--------------------------|-------|
|                              |                       | No. of<br>parameters | $R_1$ | No. of<br>parameters     | $R_1$ |
| 46                           | 36                    | 4                    | 0.088 | 5                        | 0.083 |
| 73                           | 96                    | 4                    | 0.041 | 5                        | 0.026 |

**Table S7.** Crystal structure, data collection and refinement details of *hP*24-KCl<sub>3</sub> at 41(1) and 50(1) GPa in comparison to the corresponding DFT-relaxed structure.

| <b>Crystal data</b>                                                        |                                                                                                                                                                                              |                                                                                                                                                                                              | <b>DFT results</b>                                     |
|----------------------------------------------------------------------------|----------------------------------------------------------------------------------------------------------------------------------------------------------------------------------------------|----------------------------------------------------------------------------------------------------------------------------------------------------------------------------------------------|--------------------------------------------------------|
| Chemical formula                                                           | KCl <sub>3</sub>                                                                                                                                                                             | KCl <sub>3</sub>                                                                                                                                                                             | KCl <sub>3</sub>                                       |
| $M_r$                                                                      | 145.45                                                                                                                                                                                       | 145.45                                                                                                                                                                                       |                                                        |
| Crystal system, space group                                                | Trigonal, $P\bar{3}c1$                                                                                                                                                                       | Trigonal, $P\bar{3}c1$                                                                                                                                                                       | Trigonal, $P\bar{3}c1$                                 |
| Temperature (K)                                                            | 293                                                                                                                                                                                          | 293                                                                                                                                                                                          |                                                        |
| Pressure (GPa)                                                             | 41(1)                                                                                                                                                                                        | 50(1)                                                                                                                                                                                        | 40                                                     |
| $a, c$ (Å)                                                                 | 6.991(3), 8.512(9)                                                                                                                                                                           | 6.7996(8), 8.3872(7)                                                                                                                                                                         | 6.9645, 8.5855                                         |
| $V$ (Å <sup>3</sup> )                                                      | 360.3(5)                                                                                                                                                                                     | 335.83(8)                                                                                                                                                                                    | 360.6429                                               |
| $Z$                                                                        | 6                                                                                                                                                                                            | 6                                                                                                                                                                                            |                                                        |
| Radiation type                                                             | Synchrotron, $\lambda = 0.3738$ Å                                                                                                                                                            | Synchrotron, $\lambda = 0.3738$ Å                                                                                                                                                            |                                                        |
| $\mu$ (mm <sup>-1</sup> )                                                  | 0.84                                                                                                                                                                                         | 0.90                                                                                                                                                                                         |                                                        |
| Crystal size (mm)                                                          | 0.003 × 0.003 × 0.003                                                                                                                                                                        | 0.003 × 0.003 × 0.003                                                                                                                                                                        |                                                        |
| <b>Data collection</b>                                                     |                                                                                                                                                                                              |                                                                                                                                                                                              |                                                        |
| Diffractometer                                                             | ESRF ID27, EIGER2 X CdTe 9M detector                                                                                                                                                         | ESRF ID27, EIGER2 X CdTe 9M detector                                                                                                                                                         |                                                        |
| Absorption correction                                                      | Multi-scan<br><i>CrysAlis PRO</i> 1.171.40.67a (Rigaku Oxford Diffraction, 2019) Empirical absorption correction using spherical harmonics, implemented in SCALE3 ABSPACK scaling algorithm. | Multi-scan<br><i>CrysAlis PRO</i> 1.171.40.67a (Rigaku Oxford Diffraction, 2019) Empirical absorption correction using spherical harmonics, implemented in SCALE3 ABSPACK scaling algorithm. |                                                        |
| $T_{\min}, T_{\max}$                                                       | 0.635, 1                                                                                                                                                                                     | 0.270, 1                                                                                                                                                                                     |                                                        |
| No. of measured, independent and observed [ $I > 2\sigma(I)$ ] reflections | 642, 274, 171                                                                                                                                                                                | 611, 331, 277                                                                                                                                                                                |                                                        |
| $R_{\text{int}}$                                                           | 0.039                                                                                                                                                                                        | 0.013                                                                                                                                                                                        |                                                        |
| $(\sin \theta/\lambda)_{\text{max}}$ (Å <sup>-1</sup> )                    | 0.779                                                                                                                                                                                        | 0.904                                                                                                                                                                                        |                                                        |
| <b>Refinement</b>                                                          |                                                                                                                                                                                              |                                                                                                                                                                                              |                                                        |
| $R[F^2 > 2\sigma(F^2)], wR(F^2), S$                                        | 0.080, 0.245, 1.00                                                                                                                                                                           | 0.060, 0.156, 1.01                                                                                                                                                                           |                                                        |
| No. of reflections                                                         | 274                                                                                                                                                                                          | 331                                                                                                                                                                                          |                                                        |
| No. of parameters                                                          | 20                                                                                                                                                                                           | 20                                                                                                                                                                                           |                                                        |
| $\Delta\rho_{\text{max}}, \Delta\rho_{\text{min}}$ (e Å <sup>-3</sup> )    | 1.77, -1.27                                                                                                                                                                                  | 1.81, -1.06                                                                                                                                                                                  |                                                        |
| <b>Crystal Structure</b>                                                   |                                                                                                                                                                                              |                                                                                                                                                                                              |                                                        |
| Wyckoff Site                                                               | K1: $2b$<br>K2: $4d$<br>Cl1: $6f$<br>Cl2: $12g$                                                                                                                                              | K1: $2b$<br>K2: $4d$<br>Cl1: $6f$<br>Cl2: $12g$                                                                                                                                              | K1: $2b$<br>K2: $4d$<br>Cl1: $6f$<br>Cl2: $12g$        |
| Fractional atomic coordinates (x y z)                                      | K1: 0 0 1/2<br>K2: 1/3 2/3 0.3459(3)<br>Cl1: 0 0.2543(2) 3/4                                                                                                                                 | K1: 0 0 1/2<br>K2: 1/3 2/3 0.34658(11)<br>Cl1: 0 0.25474(12) 3/4                                                                                                                             | K1: 0 0 1/2<br>K2: 1/3 2/3 0.3515<br>Cl1: 0 0.2568 3/4 |

|                                 |                                                                    |                                                                    |                              |
|---------------------------------|--------------------------------------------------------------------|--------------------------------------------------------------------|------------------------------|
|                                 | C12: 0.3106(4) 0.4087(2)<br>0.5943(2)                              | C12: 0.31075(13)<br>0.40862(11) 0.59466(9)                         | C12: 0.3029<br>0.4067 0.5983 |
| $U_{\text{iso}} (\text{\AA}^2)$ | K1: 0.0179(9)<br>K2: 0.0177(8)<br>C11: 0.0215(8)<br>C12: 0.0213(7) | K1: 0.0114(3)<br>K2: 0.0090(3)<br>C11: 0.0124(3)<br>C12: 0.0108(3) |                              |

**Table S8.** Crystal structure, data collection and refinement details of *hP18*-Na<sub>4</sub>Cl<sub>5</sub> at 50(1) and 56(1) GPa in comparison to the corresponding DFT-relaxed structure.

| <b>Crystal data</b>                                                        |                                                                                                                                                                                              |                                                                                                                                                                                              | <b>DFT results</b>                                                       |
|----------------------------------------------------------------------------|----------------------------------------------------------------------------------------------------------------------------------------------------------------------------------------------|----------------------------------------------------------------------------------------------------------------------------------------------------------------------------------------------|--------------------------------------------------------------------------|
| Chemical formula                                                           | Na <sub>4</sub> Cl <sub>5</sub>                                                                                                                                                              | Na <sub>4</sub> Cl <sub>5</sub>                                                                                                                                                              | Na <sub>4</sub> Cl <sub>5</sub>                                          |
| $M_r$                                                                      | 269.21                                                                                                                                                                                       | 269.21                                                                                                                                                                                       |                                                                          |
| Crystal system, space group                                                | Hexagonal, <i>P6<sub>3</sub>/mcm</i>                                                                                                                                                         | Hexagonal, <i>P6<sub>3</sub>/mcm</i>                                                                                                                                                         | Hexagonal, <i>P6<sub>3</sub>/mcm</i>                                     |
| Temperature (K)                                                            | 293                                                                                                                                                                                          | 293                                                                                                                                                                                          |                                                                          |
| Pressure (GPa)                                                             | 50(1)                                                                                                                                                                                        | 56(1)                                                                                                                                                                                        | 58                                                                       |
| $a, c$ (Å)                                                                 | 7.329(2), 4.7757(18)                                                                                                                                                                         | 7.2603(15), 4.7524(12)                                                                                                                                                                       | 7.2751, 4.7476                                                           |
| $V$ (Å <sup>3</sup> )                                                      | 222.14(17)                                                                                                                                                                                   | 216.95(11)                                                                                                                                                                                   | 217.6094                                                                 |
| $Z$                                                                        | 2                                                                                                                                                                                            | 2                                                                                                                                                                                            |                                                                          |
| Radiation type                                                             | Synchrotron, $\lambda = 0.2907$ Å                                                                                                                                                            | Synchrotron, $\lambda = 0.3738$ Å                                                                                                                                                            |                                                                          |
| $\mu$ (mm <sup>-1</sup> )                                                  | 0.30                                                                                                                                                                                         | 0.60                                                                                                                                                                                         |                                                                          |
| Crystal size (mm)                                                          | 0.003 × 0.003 × 0.003                                                                                                                                                                        | 0.003 × 0.003 × 0.003                                                                                                                                                                        |                                                                          |
| <b>Data collection</b>                                                     |                                                                                                                                                                                              |                                                                                                                                                                                              |                                                                          |
| Diffractometer                                                             | LH@P02.2                                                                                                                                                                                     | ESRF ID27, EIGER2 X CdTe 9M detector                                                                                                                                                         |                                                                          |
| Absorption correction                                                      | Multi-scan<br><i>CrysAlis PRO</i> 1.171.40.67a (Rigaku Oxford Diffraction, 2019) Empirical absorption correction using spherical harmonics, implemented in SCALE3 ABSPACK scaling algorithm. | Multi-scan<br><i>CrysAlis PRO</i> 1.171.40.67a (Rigaku Oxford Diffraction, 2019) Empirical absorption correction using spherical harmonics, implemented in SCALE3 ABSPACK scaling algorithm. |                                                                          |
| $T_{\min}, T_{\max}$                                                       | 0.581, 1                                                                                                                                                                                     | 0.389, 1                                                                                                                                                                                     |                                                                          |
| No. of measured, independent and observed [ $I > 2\sigma(I)$ ] reflections | 408, 133, 118                                                                                                                                                                                | 660, 193, 168                                                                                                                                                                                |                                                                          |
| $R_{\text{int}}$                                                           | 0.073                                                                                                                                                                                        | 0.022                                                                                                                                                                                        |                                                                          |
| $(\sin \theta/\lambda)_{\text{max}}$ (Å <sup>-1</sup> )                    | 0.714                                                                                                                                                                                        | 0.933                                                                                                                                                                                        |                                                                          |
| <b>Refinement</b>                                                          |                                                                                                                                                                                              |                                                                                                                                                                                              |                                                                          |
| $R[F^2 > 2\sigma(F^2)], wR(F^2), S$                                        | 0.051, 0.116, 1.03                                                                                                                                                                           | 0.033, 0.086, 1.14                                                                                                                                                                           |                                                                          |
| No. of reflections                                                         | 133                                                                                                                                                                                          | 193                                                                                                                                                                                          |                                                                          |
| No. of parameters                                                          | 13                                                                                                                                                                                           | 13                                                                                                                                                                                           |                                                                          |
| $\Delta\rho_{\text{max}}, \Delta\rho_{\text{min}}$ (e Å <sup>-3</sup> )    | 0.70, -0.79                                                                                                                                                                                  | 0.56, -0.42                                                                                                                                                                                  |                                                                          |
| <b>Crystal Structure</b>                                                   |                                                                                                                                                                                              |                                                                                                                                                                                              |                                                                          |
| Wyckoff Site                                                               | Na1: 2 <i>b</i><br>Na2: 6 <i>g</i><br>Cl1: 4 <i>d</i><br>Cl2: 6 <i>g</i>                                                                                                                     | Na1: 2 <i>b</i><br>Na2: 6 <i>g</i><br>Cl1: 4 <i>d</i><br>Cl2: 6 <i>g</i>                                                                                                                     | Na1: 2 <i>b</i><br>Na2: 6 <i>g</i><br>Cl1: 4 <i>d</i><br>Cl2: 6 <i>g</i> |
| Fractional atomic coordinates (x y z)                                      | Na1: 0 0 0<br>Na2: 0 0.3821(4) 1/4<br>Cl1: 1/3 2/3 0<br>Cl2: 0 0.2764(3) 3/4                                                                                                                 | Na1: 0 0 0<br>Na2: 0 0.3823(2) 1/4<br>Cl1: 1/3 2/3 0<br>Cl2: 0 0.2771(12) 3/4                                                                                                                | Na1: 0 0 0<br>Na2: 0 0.3819 1/4<br>Cl1: 1/3 2/3 0<br>Cl2: 0 0.2786 3/4   |

|                                 |                                                                       |                                                                      |  |
|---------------------------------|-----------------------------------------------------------------------|----------------------------------------------------------------------|--|
| $U_{\text{iso}} (\text{\AA}^2)$ | Na1: 0.0130(11)<br>Na2: 0.0097(7)<br>C11: 0.0134(6)<br>C12: 0.0082(5) | Na1: 0.0125(5)<br>Na2: 0.0145(4)<br>C11: 0.0175(3)<br>C12: 0.0117(3) |  |
|---------------------------------|-----------------------------------------------------------------------|----------------------------------------------------------------------|--|

**Table S9.** Crystal structure, data collection and refinement details of *hP18*-Na<sub>4</sub>Br<sub>5</sub> at 48(1) and 73(1) GPa in comparison to the corresponding DFT-relaxed structure.

| <b>Crystal data</b>                                                        |                                                                                                                                                                                              |                                                                                                                                                                                              | <b>DFT results</b>                                                       |
|----------------------------------------------------------------------------|----------------------------------------------------------------------------------------------------------------------------------------------------------------------------------------------|----------------------------------------------------------------------------------------------------------------------------------------------------------------------------------------------|--------------------------------------------------------------------------|
| Chemical formula                                                           | Na <sub>4</sub> Br <sub>5</sub>                                                                                                                                                              | Na <sub>4</sub> Br <sub>5</sub>                                                                                                                                                              | Na <sub>4</sub> Br <sub>5</sub>                                          |
| $M_r$                                                                      | 491.51                                                                                                                                                                                       | 491.51                                                                                                                                                                                       |                                                                          |
| Crystal system, space group                                                | Hexagonal, <i>P6<sub>3</sub>/mcm</i>                                                                                                                                                         | Hexagonal, <i>P6<sub>3</sub>/mcm</i>                                                                                                                                                         | Hexagonal, <i>P6<sub>3</sub>/mcm</i>                                     |
| Temperature (K)                                                            | 293                                                                                                                                                                                          | 293                                                                                                                                                                                          |                                                                          |
| Pressure (GPa)                                                             | 48(1)                                                                                                                                                                                        | 73(1)                                                                                                                                                                                        | 80                                                                       |
| $a, c$ (Å)                                                                 | 7.6520(14), 5.1262(19)                                                                                                                                                                       | 7.3594(6), 4.9193(3)                                                                                                                                                                         | 7.3685, 4.9147                                                           |
| $V$ (Å <sup>3</sup> )                                                      | 259.94(14)                                                                                                                                                                                   | 230.74(4)                                                                                                                                                                                    | 231.0877                                                                 |
| $Z$                                                                        | 2                                                                                                                                                                                            | 2                                                                                                                                                                                            |                                                                          |
| Radiation type                                                             | Synchrotron, $\lambda = 0.2907$ Å                                                                                                                                                            | Synchrotron, $\lambda = 0.2844$ Å                                                                                                                                                            |                                                                          |
| $\mu$ (mm <sup>-1</sup> )                                                  | 3.47                                                                                                                                                                                         | 3.68                                                                                                                                                                                         |                                                                          |
| Crystal size (mm)                                                          | 0.003 × 0.003 × 0.003                                                                                                                                                                        | 0.001 × 0.001 × 0.001                                                                                                                                                                        |                                                                          |
| <b>Data collection</b>                                                     |                                                                                                                                                                                              |                                                                                                                                                                                              |                                                                          |
| Diffractometer                                                             | LH@P02.2                                                                                                                                                                                     | ESRF ID11, Dectris Eiger2 X CdTe 4M                                                                                                                                                          |                                                                          |
| Absorption correction                                                      | Multi-scan<br><i>CrysAlis PRO</i> 1.171.40.67a (Rigaku Oxford Diffraction, 2019) Empirical absorption correction using spherical harmonics, implemented in SCALE3 ABSPACK scaling algorithm. | Multi-scan<br><i>CrysAlis PRO</i> 1.171.40.67a (Rigaku Oxford Diffraction, 2019) Empirical absorption correction using spherical harmonics, implemented in SCALE3 ABSPACK scaling algorithm. |                                                                          |
| $T_{\min}, T_{\max}$                                                       | 0.163, 1                                                                                                                                                                                     | 0.219, 1                                                                                                                                                                                     |                                                                          |
| No. of measured, independent and observed [ $I > 2\sigma(I)$ ] reflections | 612, 198, 162                                                                                                                                                                                | 1156, 248, 211                                                                                                                                                                               |                                                                          |
| $R_{\text{int}}$                                                           | 0.051                                                                                                                                                                                        | 0.037                                                                                                                                                                                        |                                                                          |
| $(\sin \theta/\lambda)_{\text{max}}$ (Å <sup>-1</sup> )                    | 0.877                                                                                                                                                                                        | 0.875                                                                                                                                                                                        |                                                                          |
| <b>Refinement</b>                                                          |                                                                                                                                                                                              |                                                                                                                                                                                              |                                                                          |
| $R[F^2 > 2\sigma(F^2)], wR(F^2), S$                                        | 0.040, 0.100, 1.06                                                                                                                                                                           | 0.026, 0.061, 1.09                                                                                                                                                                           |                                                                          |
| No. of reflections                                                         | 198                                                                                                                                                                                          | 248                                                                                                                                                                                          |                                                                          |
| No. of parameters                                                          | 13                                                                                                                                                                                           | 13                                                                                                                                                                                           |                                                                          |
| $\Delta\rho_{\text{max}}, \Delta\rho_{\text{min}}$ (e Å <sup>-3</sup> )    | 1.25, -1.44                                                                                                                                                                                  | 1.63, -1.38                                                                                                                                                                                  |                                                                          |
| <b>Crystal Structure</b>                                                   |                                                                                                                                                                                              |                                                                                                                                                                                              |                                                                          |
| Wyckoff Site                                                               | Na1: 2 <i>b</i><br>Na2: 6 <i>g</i><br>Br1: 4 <i>d</i><br>Br2: 6 <i>g</i>                                                                                                                     | Na1: 2 <i>b</i><br>Na2: 6 <i>g</i><br>Br1: 4 <i>d</i><br>Br2: 6 <i>g</i>                                                                                                                     | Na1: 2 <i>b</i><br>Na2: 6 <i>g</i><br>Br1: 4 <i>d</i><br>Br2: 6 <i>g</i> |
| Fractional atomic coordinates (x y z)                                      | Na1: 0 0 0<br>Na2: 0 0.3820(5) 1/4<br>Br1: 1/3 2/3 0<br>Br2: 0 0.2754(10) 3/4                                                                                                                | Na1: 0 0 0<br>Na2: 0 0.3820(3) 1/4<br>Br1: 1/3 2/3 0<br>Br2: 0 0.2766(8) 3/4                                                                                                                 | Na1: 0 0 0<br>Na2: 0 0.3815 1/4<br>Br1: 1/3 2/3 0<br>Br2: 0 0.2780 3/4   |

|                                 |                                                                       |                                                                         |  |
|---------------------------------|-----------------------------------------------------------------------|-------------------------------------------------------------------------|--|
| $U_{\text{iso}} (\text{\AA}^2)$ | Na1: 0.0136(13)<br>Na2: 0.0127(7)<br>Br1: 0.0116(3)<br>Br2: 0.0102(3) | Na1: 0.0068(7)<br>Na2: 0.0067(4)<br>Br1: 0.0066(15)<br>Br2: 0.00627(14) |  |
|---------------------------------|-----------------------------------------------------------------------|-------------------------------------------------------------------------|--|

**Table S10.** Crystal structure, data collection and refinement details of *tP10*-Na<sub>2</sub>Cl<sub>3</sub> at 50(1) and 56(1) GPa in comparison to the corresponding DFT-relaxed structure.

| <b>Crystal data</b>                                                        |                                                                                                                                                                                              |                                                                                                                                                                                              | <b>DFT results</b>                                                 |
|----------------------------------------------------------------------------|----------------------------------------------------------------------------------------------------------------------------------------------------------------------------------------------|----------------------------------------------------------------------------------------------------------------------------------------------------------------------------------------------|--------------------------------------------------------------------|
| Chemical formula                                                           | Na <sub>2</sub> Cl <sub>3</sub>                                                                                                                                                              | Na <sub>2</sub> Cl <sub>3</sub>                                                                                                                                                              | Na <sub>2</sub> Cl <sub>3</sub>                                    |
| $M_r$                                                                      | 152.33                                                                                                                                                                                       | 152.33                                                                                                                                                                                       |                                                                    |
| Crystal system, space group                                                | Tetragonal, <i>P4/mbm</i>                                                                                                                                                                    | Tetragonal, <i>P4/mbm</i>                                                                                                                                                                    | Tetragonal, <i>P4/mbm</i>                                          |
| Temperature (K)                                                            | 293                                                                                                                                                                                          | 293                                                                                                                                                                                          |                                                                    |
| Pressure (GPa)                                                             | 50(1)                                                                                                                                                                                        | 56(1)                                                                                                                                                                                        | 47                                                                 |
| $a, c$ (Å)                                                                 | 6.569(2), 3.0758(16)                                                                                                                                                                         | 6.533(3), 3.0363(11)                                                                                                                                                                         | 6.6055, 2.9732                                                     |
| $V$ (Å <sup>3</sup> )                                                      | 132.75(11)                                                                                                                                                                                   | 129.58(12)                                                                                                                                                                                   | 129.7269                                                           |
| $Z$                                                                        | 2                                                                                                                                                                                            | 2                                                                                                                                                                                            |                                                                    |
| Radiation type                                                             | Synchrotron, $\lambda = 0.2907$ Å                                                                                                                                                            | Synchrotron, $\lambda = 0.3738$ Å                                                                                                                                                            |                                                                    |
| $\mu$ (mm <sup>-1</sup> )                                                  | 0.30                                                                                                                                                                                         | 0.58                                                                                                                                                                                         |                                                                    |
| Crystal size (mm)                                                          | 0.003 × 0.003 × 0.003                                                                                                                                                                        | 0.001 × 0.001 × 0.001                                                                                                                                                                        |                                                                    |
| <b>Data collection</b>                                                     |                                                                                                                                                                                              |                                                                                                                                                                                              |                                                                    |
| Diffractometer                                                             | LH@P02.2                                                                                                                                                                                     | ESRF ID27, EIGER2 X CdTe 9M detector                                                                                                                                                         |                                                                    |
| Absorption correction                                                      | Multi-scan<br><i>CrysAlis PRO</i> 1.171.40.67a (Rigaku Oxford Diffraction, 2019) Empirical absorption correction using spherical harmonics, implemented in SCALE3 ABSPACK scaling algorithm. | Multi-scan<br><i>CrysAlis PRO</i> 1.171.40.67a (Rigaku Oxford Diffraction, 2019) Empirical absorption correction using spherical harmonics, implemented in SCALE3 ABSPACK scaling algorithm. |                                                                    |
| $T_{\min}, T_{\max}$                                                       | 0.508, 1                                                                                                                                                                                     | 0.747, 1                                                                                                                                                                                     |                                                                    |
| No. of measured, independent and observed [ $I > 2\sigma(I)$ ] reflections | 238, 92, 77                                                                                                                                                                                  | 306, 98, 79                                                                                                                                                                                  |                                                                    |
| $R_{\text{int}}$                                                           | 0.075                                                                                                                                                                                        | 0.044                                                                                                                                                                                        |                                                                    |
| $(\sin \theta/\lambda)_{\text{max}}$ (Å <sup>-1</sup> )                    | 0.655                                                                                                                                                                                        | 0.714                                                                                                                                                                                        |                                                                    |
| <b>Refinement</b>                                                          |                                                                                                                                                                                              |                                                                                                                                                                                              |                                                                    |
| $R[F^2 > 2\sigma(F^2)], wR(F^2), S$                                        | 0.046, 0.118, 1.12                                                                                                                                                                           | 0.043, 0.106, 1.17                                                                                                                                                                           |                                                                    |
| No. of reflections                                                         | 92                                                                                                                                                                                           | 98                                                                                                                                                                                           |                                                                    |
| No. of parameters                                                          | 11                                                                                                                                                                                           | 11                                                                                                                                                                                           |                                                                    |
| $\Delta\rho_{\text{max}}, \Delta\rho_{\text{min}}$ (e Å <sup>-3</sup> )    | 1.04, -0.69                                                                                                                                                                                  | 0.52, -0.84                                                                                                                                                                                  |                                                                    |
| <b>Crystal Structure</b>                                                   |                                                                                                                                                                                              |                                                                                                                                                                                              |                                                                    |
| Wyckoff Site                                                               | Na1: 4g<br>Cl1: 2a<br>Cl2: 4h                                                                                                                                                                | Na1: 4g<br>Cl1: 2a<br>Cl2: 4h                                                                                                                                                                | Na1: 4g<br>Cl1: 2a<br>Cl2: 4h                                      |
| Fractional atomic coordinates (x y z)                                      | Na1: 0.1425(4) 0.3575(4) 0<br>Cl1: 0 0 0<br>Cl2: 0.3443(2) 0.1557(2) 1/2                                                                                                                     | Na1: 0.3583(4) 0.1417(4) 0.0000<br>Cl1: 0 0 0<br>Cl2: 0.1563(2) 0.3437(2) 1/2                                                                                                                | Na1: 0.3587<br>0.1413 0<br>Cl1: 0 0 0<br>Cl2: 0.1586<br>0.3414 1/2 |



|                                 |                                                     |                                                    |  |
|---------------------------------|-----------------------------------------------------|----------------------------------------------------|--|
| $U_{\text{iso}} (\text{\AA}^2)$ | Na1: 0.0104(10)<br>C11: 0.0126(9)<br>C12: 0.0099(8) | Na1: 0.0193(9)<br>C11: 0.0199(7)<br>C12: 0.0180(6) |  |
|---------------------------------|-----------------------------------------------------|----------------------------------------------------|--|

**Table S11.** The parameters of the third order Birch-Murnaghan equations of states (BM3 EOSes) used to fit the theoretical P-V data for all synthesized phases.

| Compound                                     | Space group                    | Bulk modulus<br>$K_0$ (GPa) | $K_0'$  | $V_0$ ( $\text{\AA}^3$ ) |
|----------------------------------------------|--------------------------------|-----------------------------|---------|--------------------------|
| <i>hP18</i> -Na <sub>4</sub> Cl <sub>5</sub> | <i>P6<sub>3</sub>/mcm</i>      | 27.3(9)                     | 4.42(4) | 388.0(2)                 |
| <i>tP10</i> -Na <sub>2</sub> Cl <sub>3</sub> | <i>P4/mbm</i>                  | 25.7(8)                     | 4.41(4) | 223.0(12)                |
| <i>cP8</i> -NaCl <sub>3</sub>                | <i>Pm<math>\bar{3}n</math></i> | 34.9(9)                     | 4.29(3) | 167.0(6)                 |
| <i>cP8</i> -KCl <sub>3</sub>                 | <i>Pm<math>\bar{3}n</math></i> | 27.6(9)                     | 4.62(4) | 194.4(10)                |
| <i>hP24</i> -KCl <sub>3</sub>                | <i>P<math>\bar{3}c1</math></i> | 11.2(8)                     | 4.86(6) | 708.0(9)                 |
| <i>hP18</i> -Na <sub>4</sub> Br <sub>5</sub> | <i>P6<sub>3</sub>/mcm</i>      | 22.9(9)                     | 4.45(4) | 467.0(3)                 |
| <i>cP8</i> -NaBr <sub>3</sub>                | <i>Pm<math>\bar{3}n</math></i> | 28.4(10)                    | 4.46(4) | 208.4(12)                |
| <i>cP8</i> -KBr <sub>3</sub>                 | <i>Pm<math>\bar{3}n</math></i> | 25.3(8)                     | 4.47(4) | 229.4(13)                |

**Table S12.** Calculated Löwdin and Bader charge for specified atoms in B2-NaCl, *cP8* NaCl<sub>3</sub> and NaBr<sub>3</sub>, and *hP18* Na<sub>4</sub>Cl<sub>5</sub> and Na<sub>4</sub>Br<sub>5</sub> at 50 GPa, and *tP10*-Na<sub>2</sub>Cl<sub>3</sub> at 100 GPa.

| Compound                                     | Atom name | Wyckoff Site | Löwdin charge | Bader charge |
|----------------------------------------------|-----------|--------------|---------------|--------------|
| B2-NaCl <sup>[a]</sup>                       | Na1       | 1 <i>a</i>   | 0.66          | 0.82         |
|                                              | Cl1       | 1 <i>b</i>   | -0.66         | -0.82        |
| <i>cP8</i> -NaCl <sub>3</sub>                | Na1       | 2 <i>a</i>   | 0.58          | 0.84         |
|                                              | Cl1       | 6 <i>d</i>   | -0.19         | -0.28        |
| <i>cP8</i> -NaBr <sub>3</sub>                | Na1       | 2 <i>a</i>   | 0.53          | 0.83         |
|                                              | Br1       | 6 <i>d</i>   | -0.18         | -0.28        |
| <i>hP18</i> -Na <sub>4</sub> Cl <sub>5</sub> | Na1       | 2 <i>b</i>   | 0.64          | 0.80         |
|                                              | Na2       | 6 <i>g</i>   | 0.63          | 0.84         |
|                                              | Cl1       | 4 <i>d</i>   | -0.30         | -0.43        |
|                                              | Cl2       | 6 <i>g</i>   | -0.65         | -0.82        |
| <i>hP18</i> -Na <sub>4</sub> Br <sub>5</sub> | Na1       | 2 <i>b</i>   | 0.57          | 0.78         |
|                                              | Na2       | 6 <i>g</i>   | 0.58          | 0.81         |
|                                              | Br1       | 4 <i>d</i>   | -0.27         | -0.42        |
|                                              | Br2       | 6 <i>g</i>   | -0.59         | -0.79        |
| <i>tP10</i> -Na <sub>2</sub> Cl <sub>3</sub> | Na1       | 4 <i>g</i>   | 0.61          | 0.80         |
|                                              | Cl1       | 2 <i>a</i>   | -0.28         | -0.35        |
|                                              | Cl2       | 4 <i>h</i>   | -0.47         | -0.62        |

[a] The calculated Löwdin and Bader charge for specified atoms in B2-NaCl is presented as a reference.

**Table S13.** Calculated integrated COBI and COHP (ICOBI and ICOHP) values between specified atoms in B2-NaCl, *cP8* NaCl<sub>3</sub> and NaBr<sub>3</sub>, and *hP18* Na<sub>4</sub>Cl<sub>5</sub> and Na<sub>4</sub>Br<sub>5</sub> at 50 GPa, and *tP10*-Na<sub>2</sub>Cl<sub>3</sub> at 100 GPa.

| Compound                                     | Atom 1 <sup>[a]</sup> | Atom 2 <sup>[a]</sup> | Distance (d <sub>atom1-atom2</sub> ) <sup>[b]</sup> , Å | ICOBI (at) E <sub>F</sub> | -ICOHP (at) E <sub>F</sub> |
|----------------------------------------------|-----------------------|-----------------------|---------------------------------------------------------|---------------------------|----------------------------|
| B2-NaCl <sup>[c]</sup>                       | Na1                   | Na1                   | 2.925                                                   | 0.018                     | 0.328                      |
|                                              | Na1                   | Cl1                   | 2.533                                                   | 0.057                     | 0.558                      |
|                                              | Cl1                   | Cl1                   | 2.925                                                   | 0.014                     | 0.017                      |
| <i>cP8</i> -NaCl <sub>3</sub>                | Na1                   | Cl1                   | 2.613                                                   | 0.047                     | 0.510                      |
|                                              | Cl1                   | Cl1                   | 2.337                                                   | 0.285                     | 1.476                      |
| <i>cP8</i> -NaBr <sub>3</sub>                | Na1                   | Br1                   | 2.778                                                   | 0.051                     | 0.509                      |
|                                              | Br1                   | Br1                   | 2.485                                                   | 0.282                     | 1.543                      |
| <i>hP18</i> -Na <sub>4</sub> Cl <sub>5</sub> | Na1                   | Na1                   | 2.402                                                   | 0.031                     | 0.722                      |
|                                              | Na2                   | Na2                   | 2.966                                                   | 0.019                     | 0.384                      |
|                                              | Na1                   | Cl2                   | 2.375                                                   | 0.077                     | 0.742                      |
|                                              | Na2                   | Cl1                   | 2.593                                                   | 0.044                     | 0.480                      |
|                                              | Na2                   | Cl2                   | 2.504, 2.520,<br>2.521                                  | 0.068, 0.063,<br>0.063    | 0.636, 0.581,<br>0.594     |
|                                              | Cl1                   | Cl1                   | 2.402                                                   | 0.197                     | 1.056                      |
|                                              | Cl1                   | Cl2                   | 2.939                                                   | 0.009                     | 0.017                      |
| <i>hP18</i> -Na <sub>4</sub> Br <sub>5</sub> | Na1                   | Na1                   | 2.554                                                   | 0.030                     | 0.616                      |
|                                              | Na1                   | Br2                   | 2.481                                                   | 0.086                     | 0.803                      |
|                                              | Na2                   | Br1                   | 2.716                                                   | 0.049                     | 0.508                      |
|                                              | Na2                   | Br2                   | 2.622, 2.625,<br>2.677                                  | 0.072, 0.073,<br>0.063    | 0.628, 0.650,<br>0.569     |
|                                              | Br1                   | Br1                   | 2.554                                                   | 0.195                     | 1.109                      |
| <i>tP10</i> -Na <sub>2</sub> Cl <sub>3</sub> | Na1                   | Na1                   | 2.800                                                   | 0.022                     | 0.439                      |
|                                              | Na1                   | Cl1                   | 2.401                                                   | 0.052                     | 0.630                      |
|                                              | Na1                   | Cl2                   | 2.245, 2.322                                            | 0.077, 0.057              | 0.852, 0.632               |
|                                              | Cl1                   | Cl1                   | 2.800                                                   | 0.074                     | 0.249                      |
|                                              | Cl1                   | Cl2                   | 2.699                                                   | 0.032                     | 0.176                      |
|                                              | Cl2                   | Cl2                   | 2.800, 2.859                                            | 0.027, 0.022              | 0.121, 0.093               |

[a] The Wyckoff Site information of atom 1 and atom 2 can be found in Table S12. [b] Only distances from 1 Å to 3 Å were considered. [c] The calculated ICOBI and ICOHP between specified atoms in B2-NaCl is presented as a reference.

## Supplementary Figures

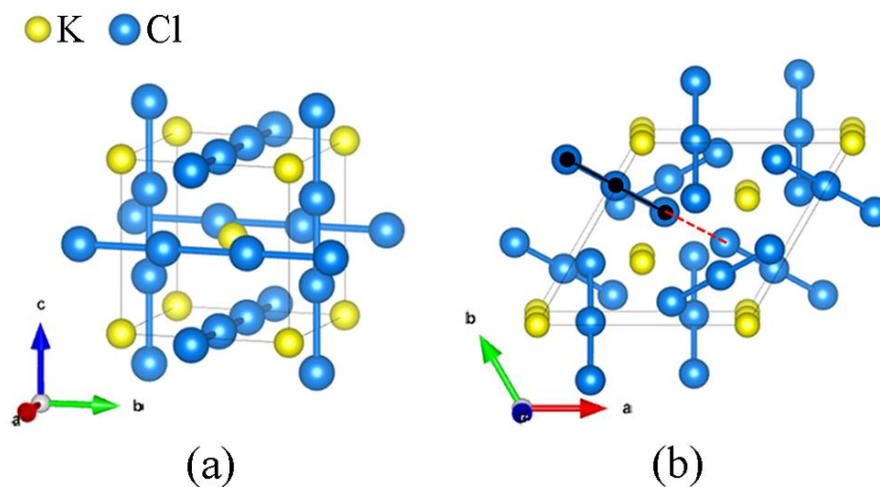

**Figure S1.** The structures of two high-pressure polymorphs of KCl<sub>3</sub> synthesised at 41 GPa and 2000 K. (a)  $cP8$ -KCl<sub>3</sub> (space group  $Pm\bar{3}n$ ), which is isostructural with  $cP8$ -NaCl<sub>3</sub>,  $cP8$ -KBr<sub>3</sub>, and  $cP8$ -NaBr<sub>3-x</sub> (see text); interatomic Cl1-Cl1 distances in the linear chains are equal to 2.4657(3) Å; (b)  $hP24$ -KCl<sub>3</sub> (space group  $P\bar{3}c1$ ), intramolecular Cl1-Cl2 distances in the trichloride anion (black lines) and intermolecular Cl2-Cl2 (red dashed line) distances are equal to 2.301(3) and 2.800(5) Å, respectively. Yellow balls are K atoms, blue balls - Cl atoms.

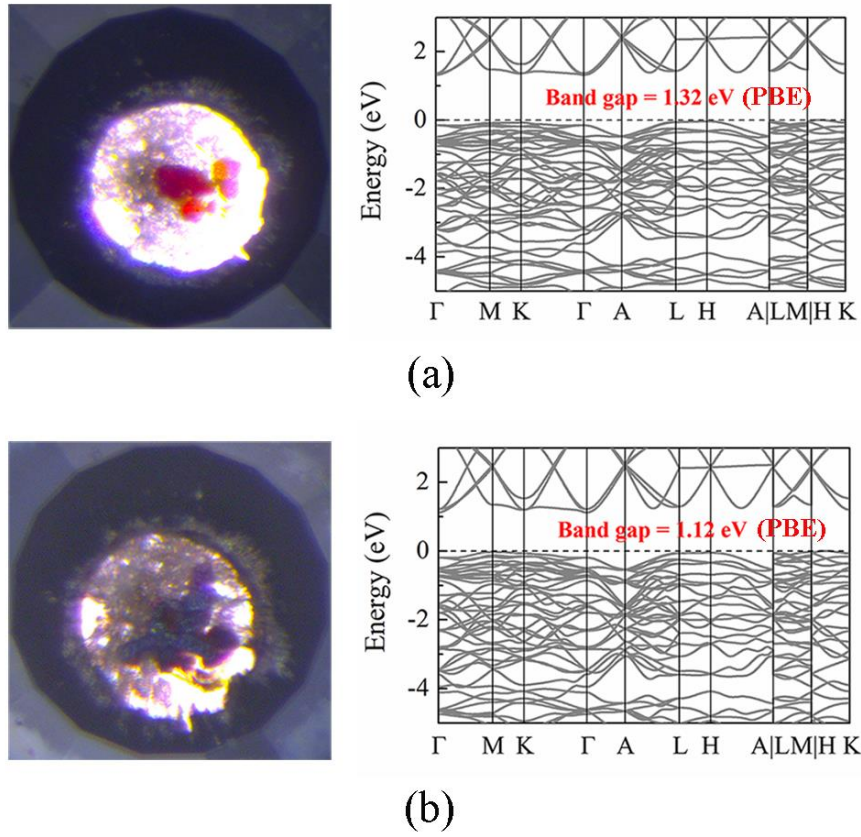

**Figure S2.** Images of a sample of  $hP24\text{-KCl}_3$  in the pressure chamber of DAC #2 taken under an optical microscope and calculated band structures of  $hP24\text{-KCl}_3$  at corresponding pressures. (a) 41 GPa; (b) 50 GPa. The Fermi energy level was set to 0 eV. The darker color of the sample at higher pressure agrees well with closing the band gap.

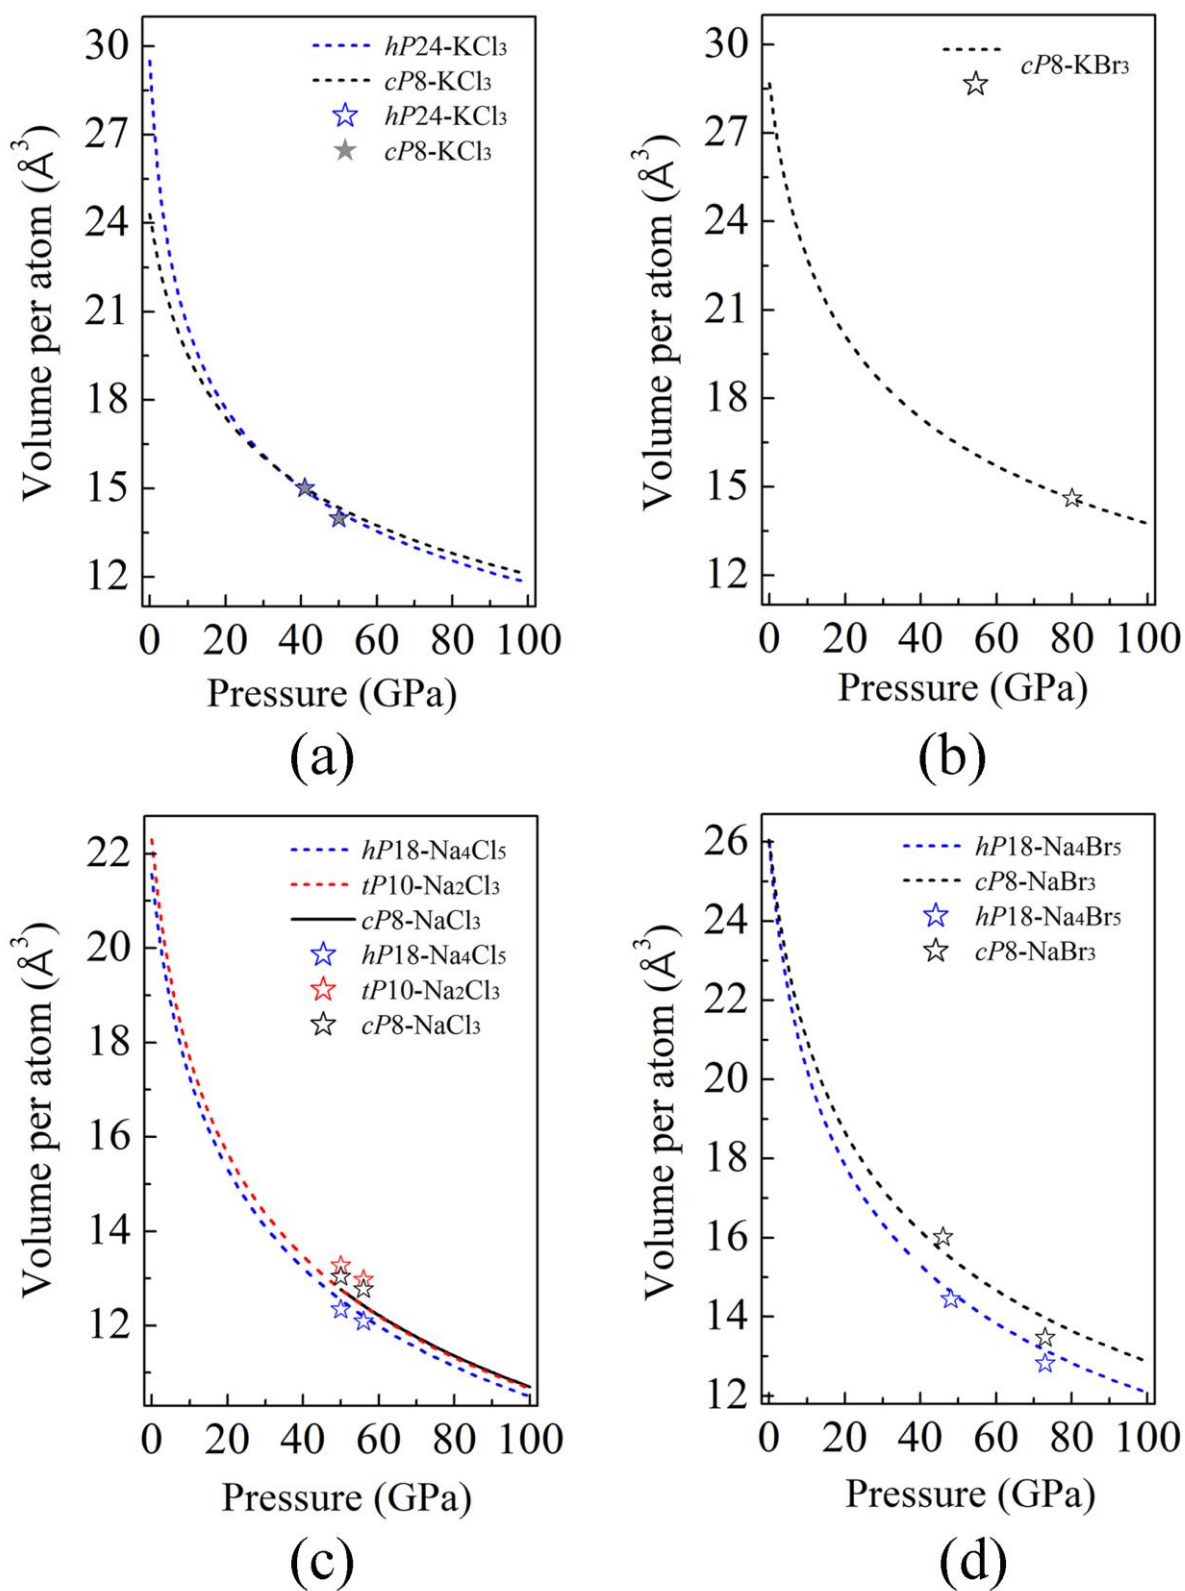

**Figure S3.** The pressure dependences of the volume per atom based on the pressure-volume relations from our DFT calculations in comparison with experimental data for (a)  $hP24\text{-KCl}_3$  and  $cP8\text{-KCl}_3$ ; (b)  $cP8\text{-KBr}_3$ ; (c)  $cP8\text{-NaCl}_3$ ,  $tP10\text{-Na}_2\text{Cl}_3$ , and  $hP18\text{-Na}_4\text{Cl}_5$ ; (d)  $cP8\text{-NaBr}_3$  and  $hP18\text{-Na}_4\text{Br}_5$ . Dashed lines represent DFT-calculated pressure for given volume fitted by BM3 EOSes. Stars of different colors represent experimental values.

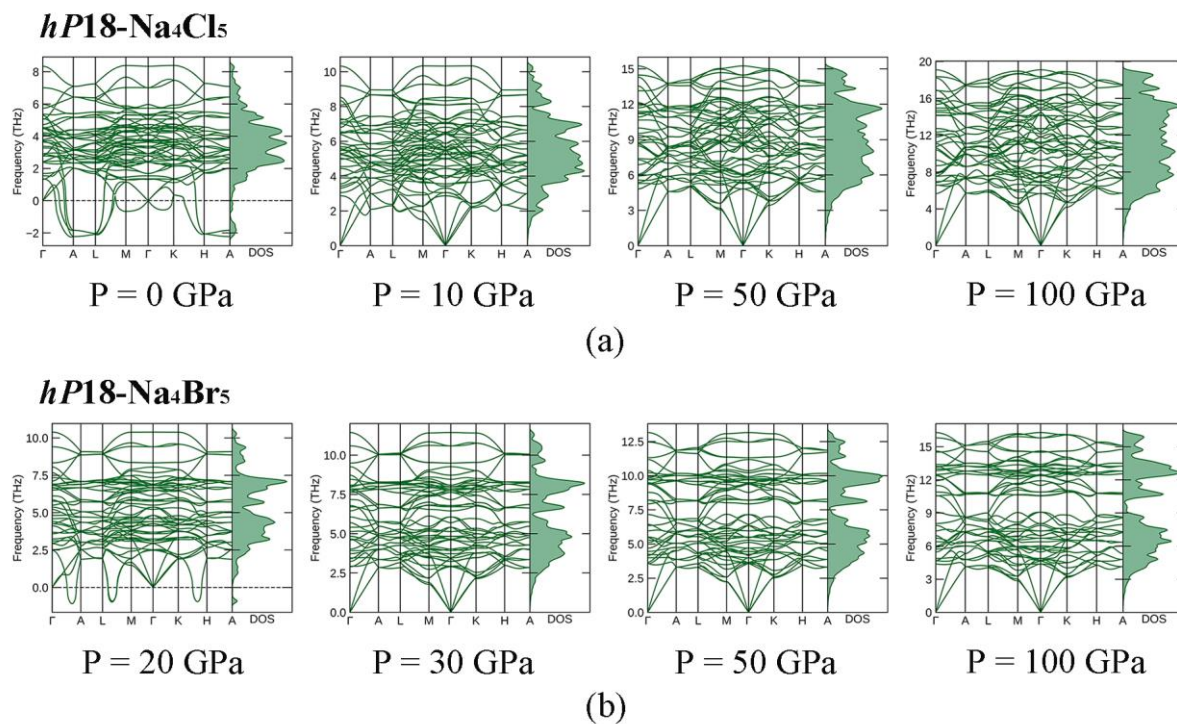

**Figure S4.** Phonon dispersion curves calculated at various pressures along high-symmetry directions in the Brillouin zone and resulting phonon density of states for (a) *hP18-Na<sub>4</sub>Cl<sub>5</sub>* and (b) *hP18-Na<sub>4</sub>Br<sub>5</sub>*.



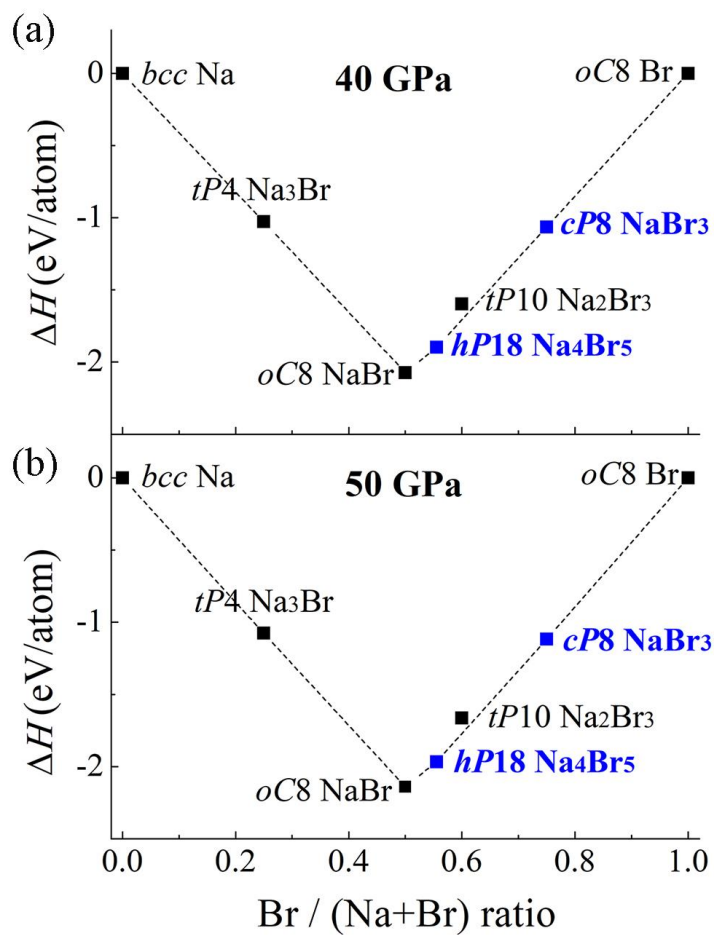

**Figure S5.** Convex hull diagrams for the Na-Br system at different pressures. (a) 40 GPa; (b) 50 GPa. The compounds synthesized in this work are highlighted in blue bold font.

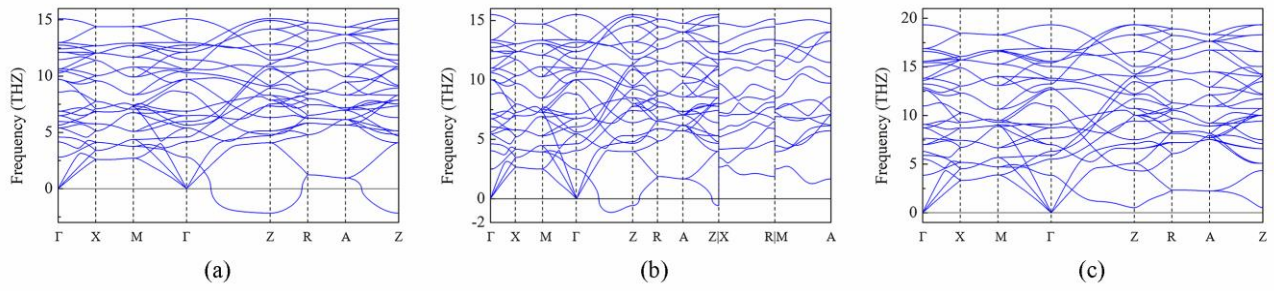

**Figure S6.** Phonon dispersion curves for *tP10*-Na<sub>2</sub>Cl<sub>3</sub> calculated at (a) 0 K and (b) 300 K at 50 GPa, and (c) 0K at 100 GPa along high-symmetry directions in the Brillouin zone.

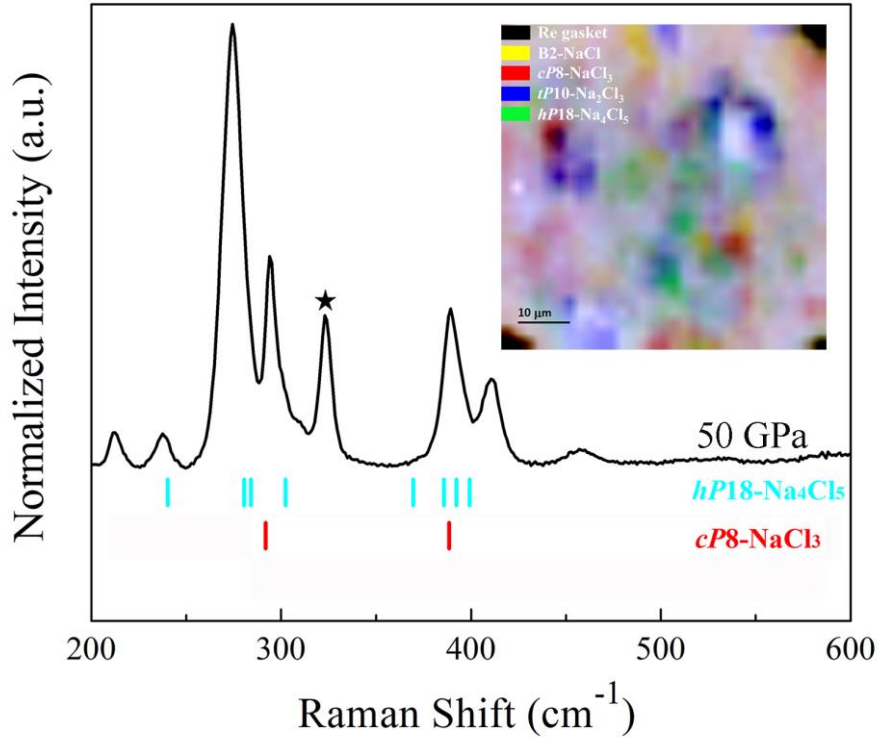

**Figure S7.** Raman spectrum taken from the sample in DAC #1 at 50 GPa and room temperature after laser heating of NaCl + CCl<sub>4</sub> + C<sub>graphite</sub> mixture to ~2000 K. The phase composition of this sample was determined using XRD mapping of the whole sample chamber, which revealed an uneven distribution of B2-NaCl, *hP18*-Na<sub>4</sub>Cl<sub>5</sub>, *tP10*-Na<sub>2</sub>Cl<sub>3</sub>, and *cP8*-NaCl<sub>3</sub> phases, formed as a result of chemical reactions (see inset). Vertical bars correspond to the positions of the Brillouin-zone-center optical phonons for *cP8*-NaCl<sub>3</sub> (red) and *hP18*-Na<sub>4</sub>Cl<sub>5</sub> (bright cyan) computed in this work. Since harmonic phonon dispersion curves of *tP10*-Na<sub>2</sub>Cl<sub>3</sub> calculated at 50 GPa show imaginary modes, we were not able to calculate its positions of the Brillouin-zone-center optical phonons. Raman peak at 323 cm<sup>-1</sup> (marked with an asterisk) can be assigned to the A<sub>g</sub> mode of *oC8* chlorine<sup>20-21</sup>. We conclude that all these phases may contribute to the Raman spectrum observed (black line).

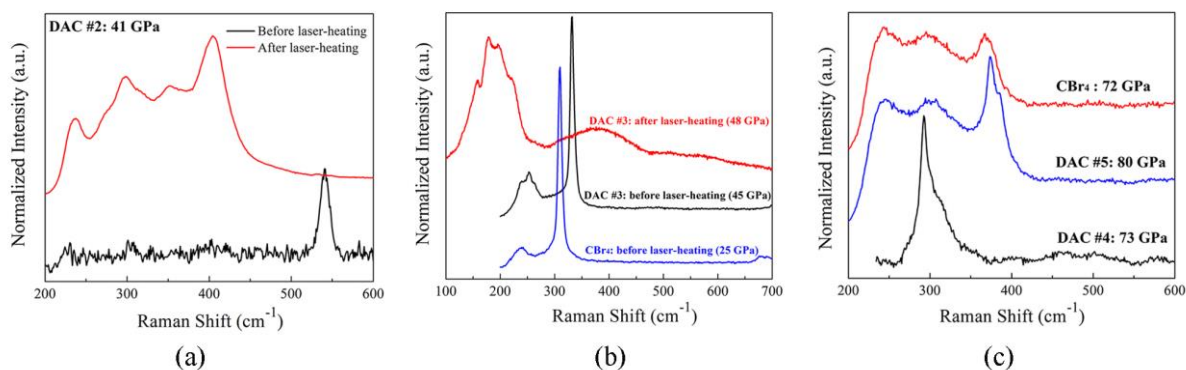

**Figure S8.** Raman spectra taken from samples in DACs #2, #3, #4, and #5 at different pressures before and after laser heating. (a) DAC #2: before heating of KCl + CCl<sub>4</sub> + C<sub>graphite</sub> mixture (black line) and after heating (red line) at 41 GPa; the peak at 540 cm<sup>-1</sup> before heating can be assigned to CCl<sub>4</sub><sup>22</sup>; after heating *hP24*-KCl<sub>3</sub> and *cP8*-KCl<sub>3</sub> phases were detected in this DAC using XRD; (b) DAC #3: before heating of CBr<sub>4</sub> + NaBr mixture (with NaBr in excess) (black line) at 45 GPa and after heating (red line) at 48 GPa, and a DAC loaded with pure CBr<sub>4</sub> (at 25 GPa before heating for reference, blue line); the peaks before heating of DAC #3 (at ~253 and 331 cm<sup>-1</sup>) can be assigned to CBr<sub>4</sub>; after heating *hP18*-Na<sub>4</sub>Br<sub>5</sub> phase was detected in this DAC using XRD; (c) DAC #4 (NaBr+CBr<sub>4</sub> at 73 GPa after heating, black line), DAC #5 (KBr + CBr<sub>4</sub> at 80 GPa after heating, blue line), and a DAC loaded with pure CBr<sub>4</sub> (at 72 GPa after heating for reference, red line); *cP8*-NaBr<sub>3</sub> and *hP18*-Na<sub>4</sub>Br<sub>5</sub> phases were detected in DAC #4 and *cP8*-KBr<sub>3</sub> was detected in DAC #5 after heating, but the signals of these reaction products are unable to detect due to strong signals from CBr<sub>4</sub> (from ~230 to 390 cm<sup>-1</sup>).

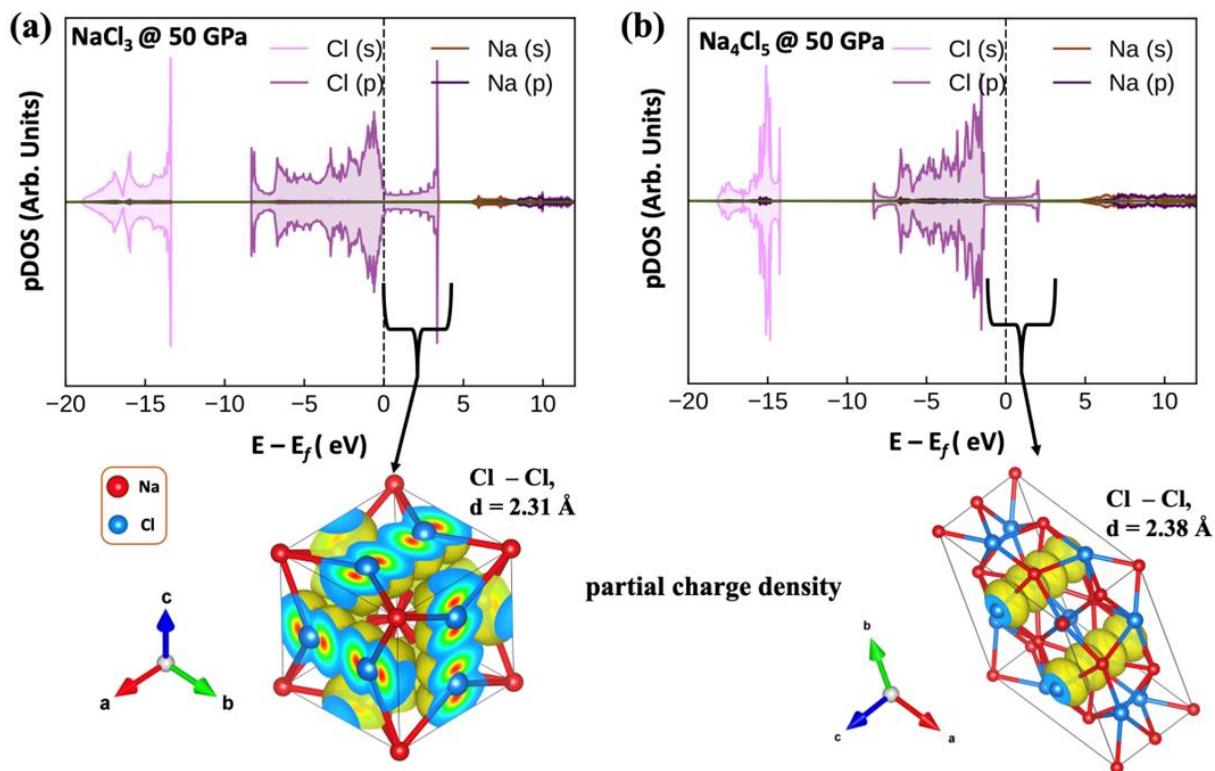

**Figure S9.** (a) (b) Projected electronic density of states (pDOS), and the corresponding partial electronic density of quasi-1D states near the Fermi energy for *cP8*- $\text{NaCl}_3$  and *hP18*- $\text{Na}_4\text{Cl}_5$  at 50 GPa. The shortest Cl-Cl bond distance is shown in the case of *hP18*- $\text{Na}_4\text{Cl}_5$  (50 GPa) on which the quasi-1D electron density lies along the *c*-axis.

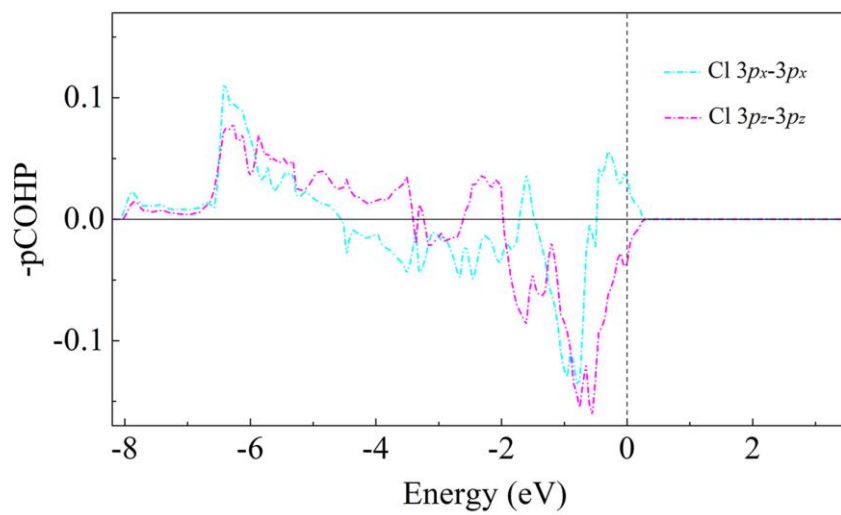

(a)

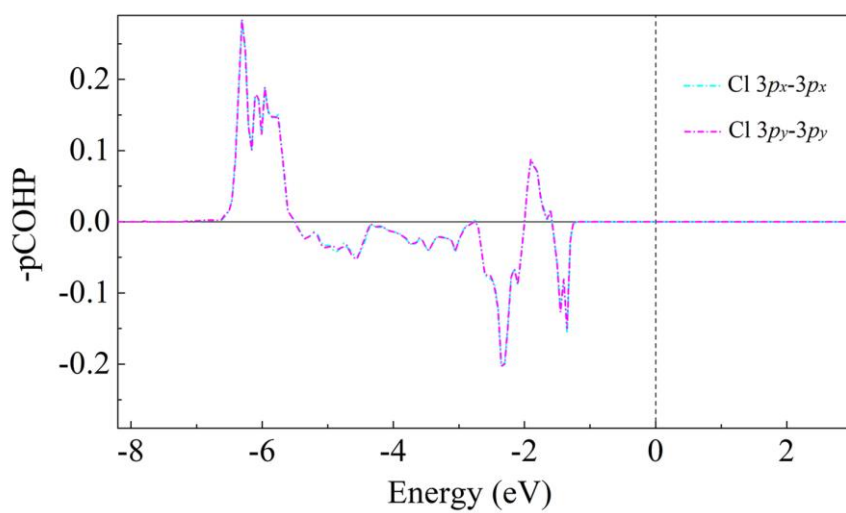

(b)

**Figure S10.** Detailed plot of the -PCOHP curves showing the  $\pi$  and  $\pi^*$  features for (a) *cP8*- $\text{NaCl}_3$  ( $\text{Cl } 3p_x$ - $3p_x$  and  $\text{Cl } 3p_z$ - $3p_z$ ) and (b) *hP18*- $\text{Na}_4\text{Cl}_5$  ( $\text{Cl } 3p_x$ - $3p_x$  and  $\text{Cl } 3p_y$ - $3p_y$ ). The vertical dashed line indicates the Fermi energy.

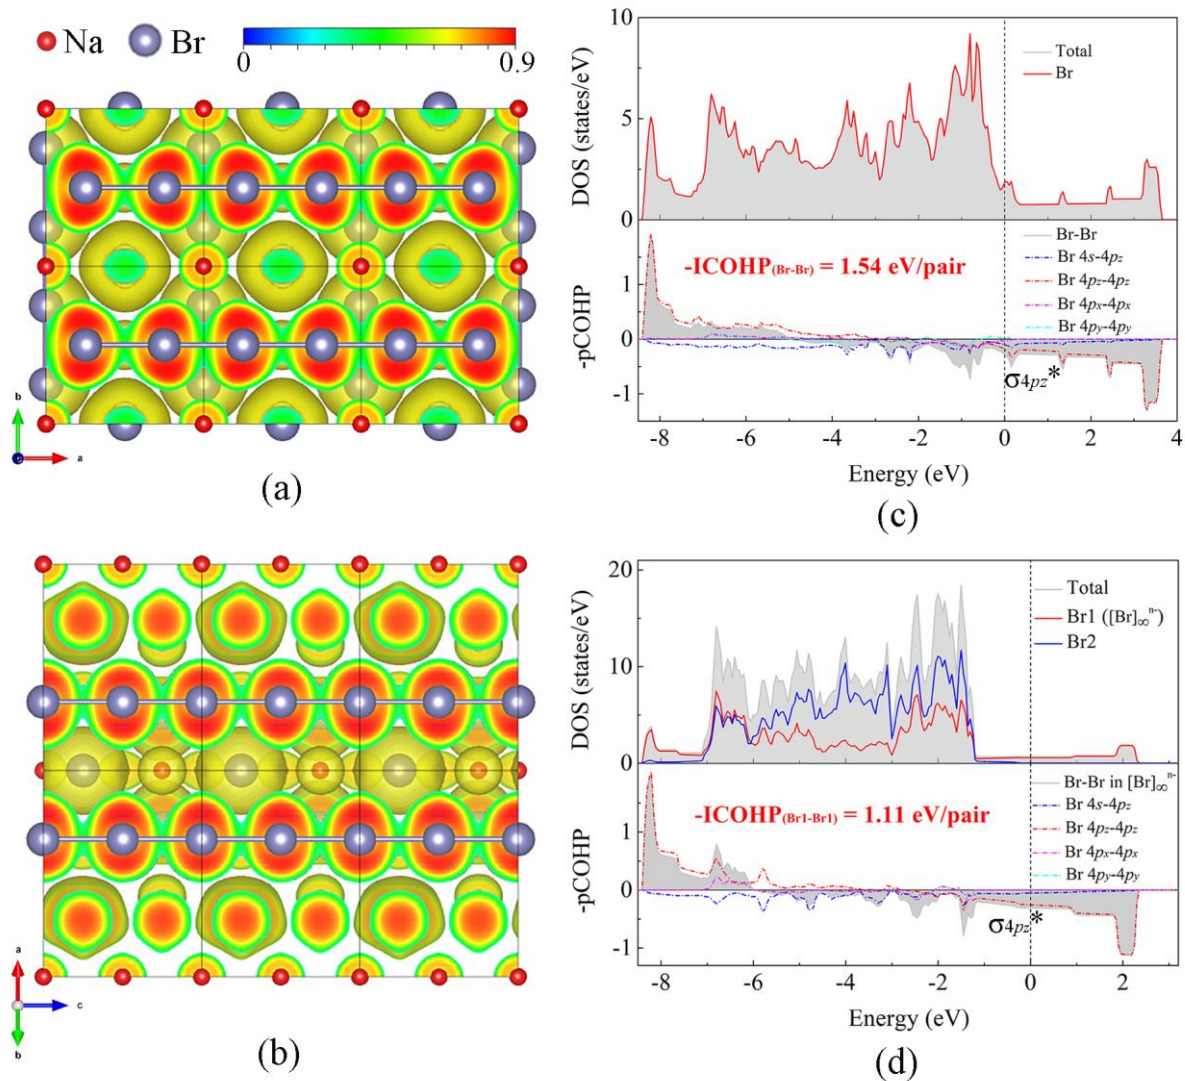

**Figure S11.** Calculated properties of *cP8*-NaBr<sub>3</sub> and *hP18*-Na<sub>4</sub>Br<sub>5</sub> at 50 GPa. (a) Electron localization function (ELF) calculated in (001) plane for *cP8*-NaBr<sub>3</sub> and (b) in (110) plane for *hP18*-Na<sub>4</sub>Br<sub>5</sub>. The isosurfaces value is set as 0.3. Na and Br atoms are shown in red and purple colors. Calculated TDOS and PDOS curves for (c) *cP8*-NaBr<sub>3</sub> and (d) *hP18*-Na<sub>4</sub>Br<sub>5</sub> along with the -pCOHP and -ICOHP for the Br-Br bond in the linear [Br]<sub>∞</sub><sup>n-</sup> chains. The vertical dashed line indicates the Fermi energy.

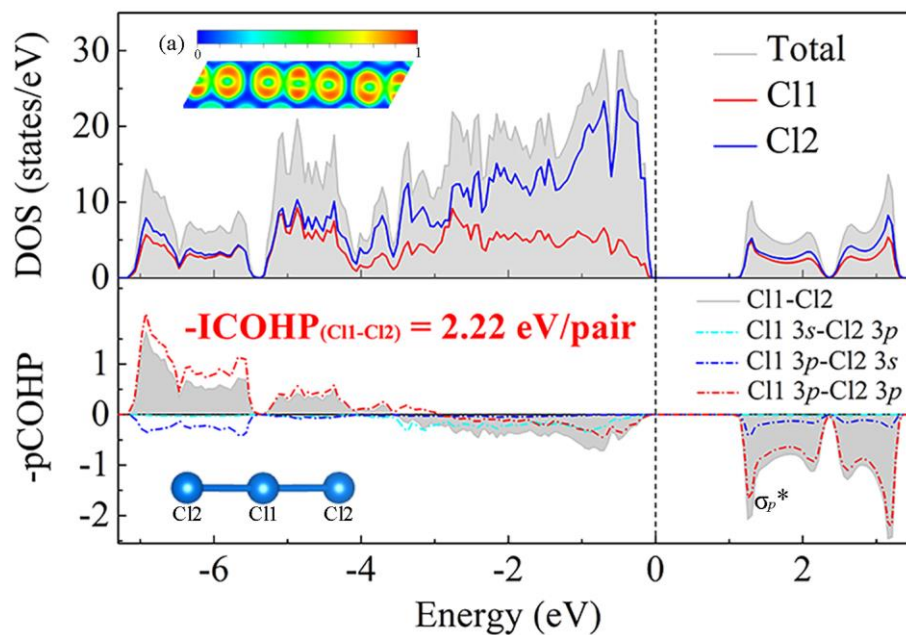

**Figure S12.** Calculated TDOS and PDOS curves of  $hP24\text{-KCl}_3$  together with the  $-p\text{COHP}$  and  $-\text{ICOHP}$  of the Cl1-Cl2 bond in the isolated  $[\text{Cl}_3]^-$  molecules. The vertical dashed line indicates the Fermi energy. Cl1 represents the middle Cl atom and Cl2 represents the terminal Cl atom. The insert (a) shows the 2D ELF map of  $hP24\text{-KCl}_3$  at 50 GPa cut along the  $[\text{Cl}_3]^-$  planes, which is similar to the ELF distribution of  $\text{XeF}_2$  (see ELF of  $\text{XeF}_2$  at 50 GPa published by Miao<sup>23</sup>).



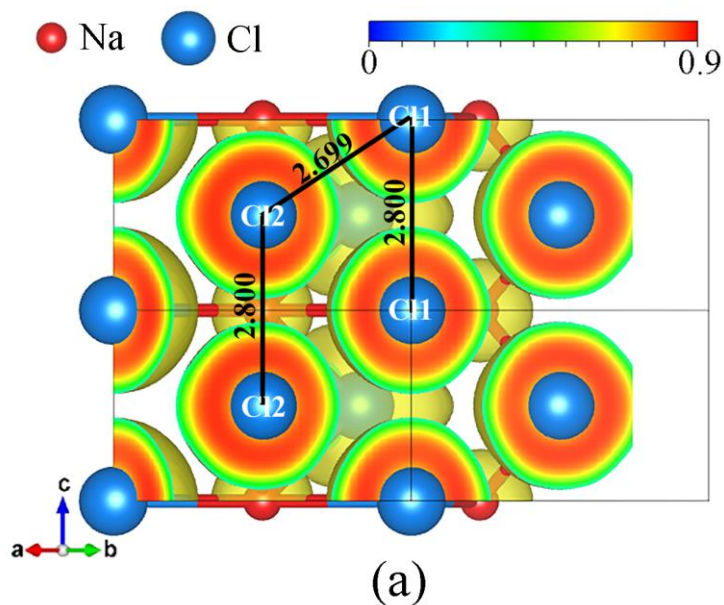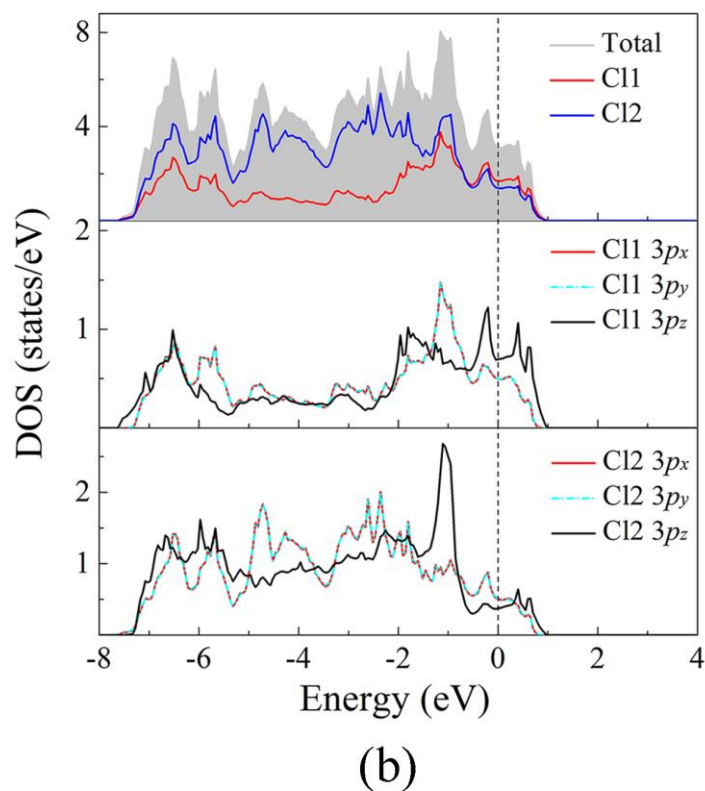

**Figure S13.** (a) ELF of *tP10*- $\text{Na}_2\text{Cl}_3$  cut along the section plane of the first neighboring Cl atoms (Cl1-Cl2) calculated at 100 GPa. Important Cl-Cl distances ( $\text{\AA}$ ) are presented. The isosurfaces value is set as 0.3. Na and Cl atoms are shown in red and blue colors. (b) The TDOS and PDOS curves, and Cl-3*p* orbitals in *tP10*- $\text{Na}_2\text{Cl}_3$  at 100 GPa. The vertical dashed line indicates the Fermi energy.

## Supplementary References

1. Kantor, I.; Prakapenka, V.; Kantor, A.; Dera, P.; Kurnosov, A.; Sinogeikin, S.; Dubrovinskaia, N.; Dubrovinsky, L., BX90: a new diamond anvil cell design for X-ray diffraction and optical measurements. *Rev. Sci. Instrum.* **2012**, *83* (12), 125102.
2. Akahama, Y.; Kawamura, H., Pressure calibration of diamond anvil Raman gauge to 310GPa. *J. Appl. Phys.* **2006**, *100* (4), 043516.
3. Fedotenko, T.; Dubrovinsky, L.; Aprilis, G.; Koemets, E.; Snigirev, A.; Snigireva, I.; Barannikov, A.; Ershov, P.; Cova, F.; Hanfland, M., Laser heating setup for diamond anvil cells for in situ synchrotron and in house high and ultra-high pressure studies. *Rev. Sci. Instrum.* **2019**, *90* (10), 104501.
4. Rigaku Oxford Diffraction Ltd. *Rigaku OD and CryAlis PRO* **2018**.
5. Aslandukov, A.; Aslandukov, M.; Dubrovinskaia, N.; Dubrovinsky, L., Domain Auto Finder (DAFi) program: the analysis of single-crystal X-ray diffraction data from polycrystalline samples. *J. Appl. Crystallogr.* **2022**, *55* (Pt 5), 1383-1391.
6. Dolomanov, O. V.; Bourhis, L. J.; Gildea, R. J.; Howard, J. A. K.; Puschmann, H., OLEX2: a complete structure solution, refinement and analysis program. *J. Appl. Crystallogr.* **2009**, *42* (2), 339-341.
7. Petříček, V.; Dušek, M.; Palatinus, L., Crystallographic Computing System JANA2006: General features. *Z KRIST-CRYST MATER* **2014**, *229* (5), 345-352.
8. Kresse, G.; Furthmüller, J., Efficiency of ab-initio total energy calculations for metals and semiconductors using a plane-wave basis set. *Comput. Mater. Sci.* **1996**, *6* (1), 15-50.
9. Blochl, P. E., Projector augmented-wave method. *Phys. Rev., B Condens. Matter* **1994**, *50* (24), 17953-17979.
10. Kresse, G.; Joubert, D., From ultrasoft pseudopotentials to the projector augmented-wave method. *Phys Rev B* **1999**, *59* (3), 1758-1775.
11. Perdew, J. P.; Burke, K.; Ernzerhof, M., Generalized Gradient Approximation Made Simple. *Phys. Rev. Lett.* **1996**, *77* (18), 3865-3868.
12. Momma, K.; Izumi, F., VESTA: a three-dimensional visualization system for electronic and structural analysis. *J. Appl. Crystallogr.* **2008**, *41* (3), 653-658.
13. Togo, A.; Oba, F.; Tanaka, I., First-principles calculations of the ferroelastic transition between rutile-type and CaCl<sub>2</sub>-type SiO<sub>2</sub> at high pressures. *Phys Rev B* **2008**, *78* (13), 134106.
14. Hellman, O.; Abrikosov, I.; Simak, S., Lattice dynamics of anharmonic solids from first principles. *Physical Review B* **2011**, *84* (18), 180301.
15. Dronskowski, R.; Blochl, P. E., Crystal orbital Hamilton populations (COHP): energy-resolved visualization of chemical bonding in solids based on density-functional calculations. *The Journal of Physical Chemistry* **2002**, *97* (33), 8617-8624.
16. Müller, P. C.; Ertural, C.; Hempelmann, J.; Dronskowski, R., Crystal Orbital Bond Index: Covalent Bond Orders in Solids. *The Journal of Physical Chemistry C* **2021**, *125* (14), 7959-7970.
17. Deringer, V. L.; Tchougreeff, A. L.; Dronskowski, R., Crystal orbital Hamilton population (COHP) analysis as projected from plane-wave basis sets. *J. Phys. Chem. A* **2011**, *115* (21), 5461-6.
18. Maintz, S.; Deringer, V. L.; Tchougreeff, A. L.; Dronskowski, R., Analytic projection from plane-wave and PAW wavefunctions and application to chemical-bonding analysis in solids. *J. Comput. Chem.* **2013**, *34* (29), 2557-67.
19. Maintz, S.; Deringer, V. L.; Tchougreeff, A. L.; Dronskowski, R., LOBSTER: A tool to extract chemical bonding from plane-wave based DFT. *J. Comput. Chem.* **2016**, *37* (11), 1030-5.
20. Johannsen, P. G.; Holzapfel, W. B., Effect of pressure on Raman spectra of solid chlorine. *Journal of Physics C: Solid State Physics* **1983**, *16* (33), L1177-L1179.
21. Dalladay-Simpson, P.; Binns, J.; Pena-Alvarez, M.; Donnelly, M. E.; Greenberg, E.; Prakapenka, V.; Chen, X. J.; Gregoryanz, E.; Howie, R. T., Band gap closure, incommensurability and molecular dissociation of dense chlorine. *Nat Commun* **2019**, *10* (1), 1134.

22. Pravica, M.; Sneed, D.; Wang, Y.; Smith, Q.; Subrahmanyam, G., Carbon tetrachloride under extreme conditions. *J. Chem. Phys.* **2014**, *140* (19), 194503.
23. Miao, M. S., Caesium in high oxidation states and as a p-block element. *Nat Chem* **2013**, *5* (10), 846-52.
